# Supplementary material
Source: HighWire-hosted journal article supplement (https://science.sciencemag.org/content/suppl/2017/09/14/357.6356.eaan6558)
Supplement: aan6558_Thubagere_SM_Rev.pdf [file aan6558_Thubagere_SM_Rev.pdf]

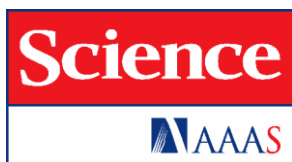

## Supplementary Materials for

### **A cargo-sorting DNA robot**

Anupama J. Thubagere, Wei Li, Robert F. Johnson, Zibo Chen,  
Shayan Doroudi, Yae Lim Lee, Gregory Izatt, Sarah Wittman,  
Niranjan Srinivas, Damien Woods, Erik Winfree, Lulu Qian\*

\*Corresponding author. Email: [luluqian@caltech.edu](mailto:luluqian@caltech.edu)

Published 15 September 2017, *Science* **357**, eaan6558 (2017)

DOI: 10.1126/aan6558

#### **This PDF file includes:**

Materials and Methods  
Supplementary Text  
Figs. S1 to S14  
Tables S1 and S2  
References

#### **Revisions:**

The following revisions and clarifications have been made: (i) The Materials and Methods section has been removed, as it was an exact duplicate of the Materials and Methods in the main text. (ii) A new section, "Additional notes on simulations," has been added. This new section clarifies that in the cargo-sorting experiments, each of the six cargo initial locations could have either a cargo1 or a cargo2. For exposition, a canonical example order of cargos in all initial state diagrams is shown, but it should be understood that other initial cargo arrangements are possible. The implications of this understanding on simulations when compared with experimental data are further discussed. (iii) Missing axis labels in Fig. S3B have been added.

# Supplementary Materials for A cargo-sorting DNA robot

Anupama J. Thubagere, Wei Li, Robert F. Johnson,  
Zibo Chen, Shayan Doroudi, Yae Lim Lee, Gregory Izatt, Sarah Wittman,  
Niranjan Srinivas, Damien Woods, Erik Winfree & Lulu Qian\*

\*correspondence to: luluqian@caltech.edu

## Contents

|          |                                                                                         |           |
|----------|-----------------------------------------------------------------------------------------|-----------|
| <b>1</b> | <b>Additional notes on simulations</b>                                                  | <b>2</b>  |
| <b>2</b> | <b>Supplementary data and analysis</b>                                                  | <b>3</b>  |
| 2.1      | The rigidity of DNA origami affects the undesired reactions . . . . .                   | 3         |
| 2.2      | The DNA sequence of the foot domains of the robot affects the rate of walking . . . . . | 4         |
| 2.3      | A biophysical model of the walking mechanism . . . . .                                  | 5         |
| 2.4      | The purity of DNA origami affects the completion level of desired reactions . . . . .   | 9         |
| 2.5      | Numerical analysis of the random walk . . . . .                                         | 10        |
| 2.6      | Cargo pick-up . . . . .                                                                 | 11        |
| 2.7      | Procedure for preparing cargo-sorting samples . . . . .                                 | 12        |
| 2.8      | Negative control for cargo sorting without a robot . . . . .                            | 13        |
| 2.9      | Procedure for preparing cargo-sorting samples for AFM imaging . . . . .                 | 14        |
| 2.10     | AFM images of the cargos at their initial locations and destinations . . . . .          | 15        |
| 2.11     | Cargo sorting with mixed populations of DNA origami . . . . .                           | 16        |
| 2.12     | Analysis of the completion levels in the cargo-sorting experiments . . . . .            | 17        |
| 2.13     | Multiple robots collectively performing a cargo-sorting task . . . . .                  | 19        |
| <b>3</b> | <b>Cadnano diagram</b>                                                                  | <b>20</b> |
| 3.1      | Double-layer square DNA origami design . . . . .                                        | 20        |
| <b>4</b> | <b>DNA sequences</b>                                                                    | <b>21</b> |
| 4.1      | Staples . . . . .                                                                       | 21        |
| 4.2      | Robot, track, cargo and goal strands . . . . .                                          | 25        |
|          | <b>References</b>                                                                       | <b>26</b> |

# 1 Additional notes on simulations

There are four aspects of the stochastic simulations for cargo-sorting should be noted:

(i) With the origami annealing protocol, each of the six cargo initial locations could either have a cargo1 or a cargo2. For exposition, we show a canonical example order of cargos in all initial state diagrams (in Figs. 3B, 4A, 4C, S8, S11 and S13), but it should be understood that other initial cargo arrangements are possible. (Note that if desired, one could achieve a specific order by separately annealing each type of cargo with its attacher strand first and then incubate the cargo complex with the origami. See domain identities in Fig. S7.) To simplify simulations of the single and multirobot cargo-sorting experiments, we assumed three cargos of each type were placed on each origami surface in the canonical arrangement. However, a fraction of origami could have an unbalanced number of the two cargo types, which makes the simplified model modestly different from the real system behavior.

(ii) Because each of the six cargo initial locations has a random choice of cargo1 or cargo2, we expect that 11% of the origami would have more cargo1 than goal1 and another 11% would have more cargo2 than goal2. Could this be one of the reasons that only 80% of the cargos were sorted with a single robot? Unlikely. Because the completion-level analysis suggested more than 8% of inter-origami cargo and goal interactions (Fig. S12B), most of the extra cargos on one origami should have eventually landed on the extra goals on another origami.

(iii) The three types of inter-origami reactions shown in Fig. S12B were also not included in the simulations. We suspect this is the reason that the data showed gradual signal decrease while the simulations showed flat signal trajectories toward the end of the experiments: The real system, with a fraction of origami that have unbalanced cargo counts, has to wait for inter-origami cargo transfer before all cargos can reach a goal.

(iv) As discussed in the main text and Fig. 4B, the model allowed cargo pickup and drop-off reactions within a maximum reachable distance, with the reaction rate decreasing quadratically with the distance. To calculate the maximum reachable distance (Fig. 4B caption), we used 0.5 nm per nt for slightly stretched lengths of single-strand domains, which is larger than the 0.43 nm per nt that we used for the average lengths of single-stranded domains shown in Fig. S4A. With the maximum reachable distance being 21.94 nm, the robot placed in the center of the origami in the single-robot cargo-sorting experiments could reach one of the six cargos immediately without walking, and drop it off at one of the goal locations. However, to sort all six cargos, the simulation suggests that the robot should take an average of 295 steps. For the multi-robot cargo-sorting experiments, the robots were placed farther away from the cargos, and no robot should reach a cargo without walking.

## 2 Supplementary data and analysis

### 2.1 The rigidity of DNA origami affects the undesired reactions

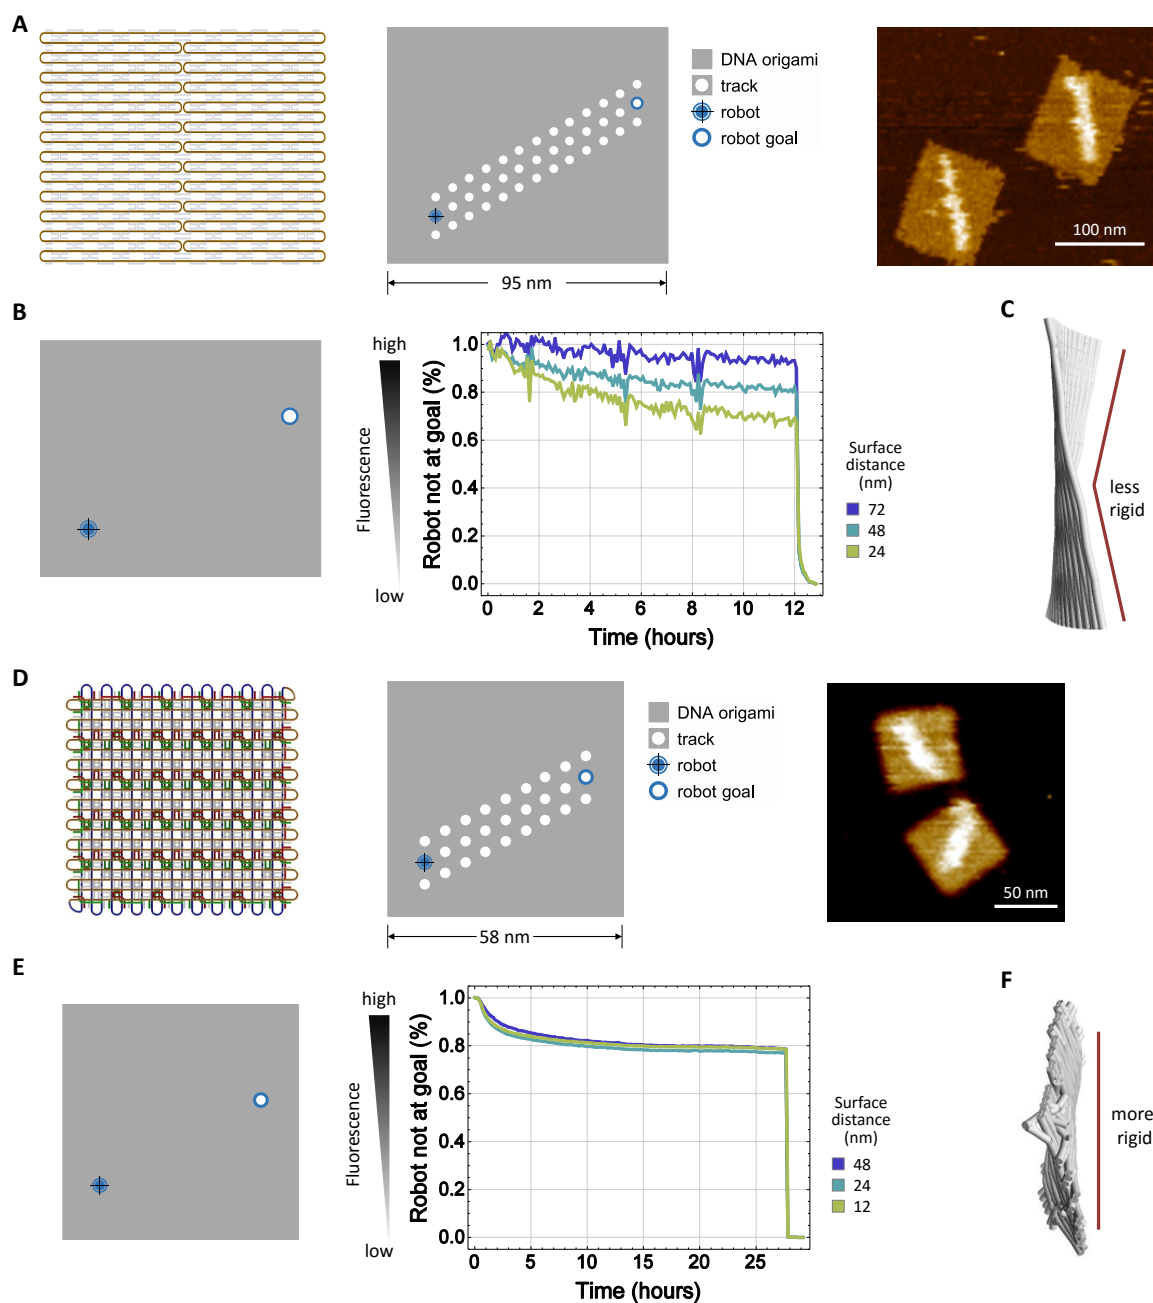

**Fig. S1. The rigidity of DNA origami affects the undesired reactions.** (A) Scaffold path, schematic diagram, and Atomic Force Microscope (AFM) image of a single-layer rectangular DNA origami (6) with a linear track. (B) Schematic diagram and fluorescence kinetics data of a negative control experiment for the robot reaching the goal without any track on the single-layer origami. Three distinct surface distances between the robot and the goal were tested. (C) CanDo (32) diagram showing the predicted deformations of the single-layer origami structure. Substantial thermal fluctuations can be observed in a CanDo movie. (D) Scaffold path, schematic diagram, and AFM image of a double-layer square DNA origami with a linear track. (E) Schematic diagram and fluorescence kinetics data of a negative control experiment for the robot reaching the goal without any track on the double-layer origami. Three distinct surface distances between the robot and the goal were tested. (F) CanDo diagram showing the degree of thermal fluctuations of the double-layer origami structure. Limited thermal fluctuations can be observed in a CanDo movie.

## 2.2 The DNA sequence of the foot domains of the robot affects the rate of walking

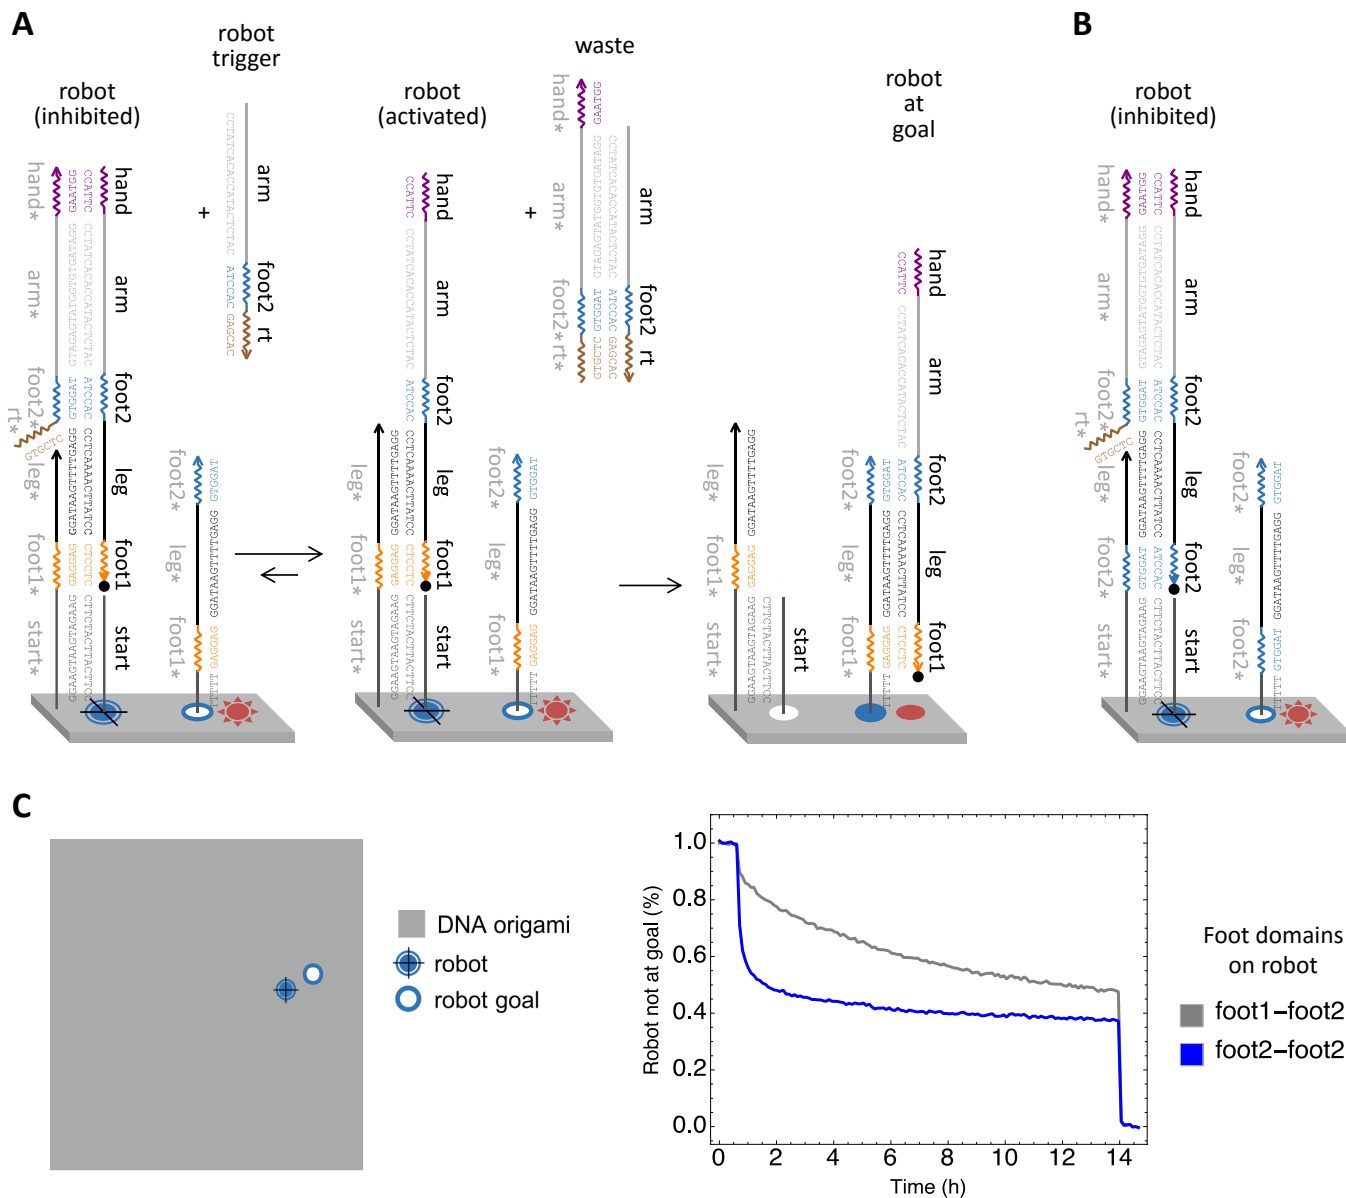

**Fig. S2. The DNA sequence of the foot domains of the robot affects the rate of walking.** (A) Sequence-level diagram of the mechanism of the robot making a single step to reach the goal after being triggered. Two distinct sequences are used for the two feet. (B) Sequence-level diagram of the same setup as shown in A, but with identical sequences used for the two feet. (C) Schematic diagram and fluorescence kinetics data of the robot taking a single step. Two sequence choices shown in A and B were both tested. The sequence of foot1 has a stronger standard free energy and that of foot2 has a weaker standard free energy. NUPACK (52) predicts  $-8.76$  kcal/mol for foot1 and  $-8.55$  kcal/mol for foot2 at  $25$  °C, without considering the stacking energy on the 5' and 3' ends.

### 2.3 A biophysical model of the walking mechanism

To better understand the mechanism of walking, we developed a biophysical model. We do not have enough experimental data to accurately fit parameters or verify mechanisms involved in the model, but it is already conceptually insightful for understanding why the robot walks at a fairly slow rate and how the rate could potentially be much faster.

We start with an irreversible reaction from track type 1 to the goal, as shown in Fig. S3A. In this model, RTr1[27] is the robot at the track1 location. 27 corresponds to the total number of nucleotides in the robot strand that are involved in walking: two foot domains that each have 6 nucleotides and one leg domain that has 15 nucleotides. RG[ $i$ ] is the robot with  $i$  nucleotides bound to the goal location.  $k_h$  is the rate constant of localized hybridization. In position  $i$ ,  $k_{5d}^i$  and  $k_{3d}^i$  are the rate constants of disassociation from the 5' end and 3' end of the robot strand, respectively.  $k_{5b}^i$  and  $k_{3b}^i$  are the rate constants of a single-base-pair branch migration step from the  $i$ -th nucleotide toward the 5' end and 3' end of the robot strand, respectively.

$k_h$  can be estimated using two methods. First, similar to the estimates in localized DNA circuits (50, 53),  $k_h =$  the rate constant of hybridization in solution  $\times$  the local concentration. The rate of DNA hybridization is approximately  $10^6$  /M/s at 25 °C (54). The local concentration can be estimated as  $(1 / N_A) / (4\pi/3 \times (6 \text{ nm})^3)$ , where  $N_A$  is the Avogadro's constant, and 6 nm is the distance between the robot start and goal locations. Therefore,  $k_h \approx 1835$  /s. Second,  $k_h$  can be estimated as the rate constant of closing a hairpin. From a previous study on the kinetics of hairpin opening and closing (55),  $k_{close}^n \approx k_0(n + 5)^{-2.5}$  at 25 °C, where  $n$  is the loop size, and  $k_{close}^{30} \approx 5 \times 10^3$  /s. In our system, the loop size can be estimated as  $((15 + 6 + 15) \text{ bp} \times 0.34 \text{ nm/bp} + 6 \text{ nm} + (15 + 6) \text{ nt} \times 0.43 \text{ nm/nt}) / (0.43 \text{ nm/nt}) = 63 \text{ nt}$ . Therefore,  $k_h \approx 950$  /s. We use  $k_h = 10^3$  /s, which roughly agrees with both estimates.

For a generic sequence, the disassociation rate constant can be modeled as  $k_d = 10^{(6-L)}$  /s for a hybridization domain of length  $L$  with a reference standard free energy  $\overline{\Delta G}$  for each base pair, which is close to the average standard free energy at 25 °C (54). Therefore, in our system,  $k_{5d}^i = 10^{6-i}$  /s and  $k_{3d}^i = 10^{6-(27-i)}$  /s. Because we are interested in how the standard free energy of the foot domain near the 3' end of the robot strand affects the rate of walking (Fig. S2), for the irreversible reaction shown in Fig. S3A, we re-define  $k_{3d}^i = 10^{6-\Delta G/\overline{\Delta G}(27-i)}$  /s, where  $\Delta G$  is the standard free energy for each base pair with a specific sequence that could be stronger ( $\Delta G/\overline{\Delta G} > 1$ ) or weaker ( $\Delta G/\overline{\Delta G} < 1$ ) than average.

From a previous biophysics study of strand displacement reactions (56), the initiation of branch migration is about 5 /s and each of the following steps is about  $10^4$  /s. We use these two rate constants to define  $k_{5b}^i$ , for branch migration away from the DNA origami surface (except there will be no initiation step for an irreversible reaction that ends at the 5' end). However, taking the elasticity of double- and single-stranded DNA into consideration (34), branch migration toward the DNA origami surface should lead to a tighter stretch of the DNA strands and thus a slowdown of the rate constant. Since we designed appropriate linker lengths for the robot to reach an adjacent track location (Fig. S4A), the strands should not be overstretched and thus should remain within the "entropic elasticity" regime where the force increases linearly with the distance stretched, corresponding to a quadratic energy cost for stretching the "entropic spring". Thus we define  $k_{3b}^i = 5$  /s when  $i = 6$ ,  $k_{3b}^i = 10^4$  /s when  $6 < i \leq th$ , and  $k_{3b}^i = 10^{4-w(i-th)}$  /s when  $i > th$ , where  $th$  is nucleotide location for which the force starts to increase when branch migration moves close enough to the origami surface, and  $w$  is the energy change per step. This model is qualitatively consistent with a molecular dynamics study of a similar system (33).

By comparing simulation with the experimental data shown in Fig. S2C, we were able to determine that  $th = 19$  and  $w = 2$  are reasonable parameters for our system. The model suggest that (1) the entropic cost of stretching the DNA strands significantly slows down branch migration toward the DNA origami

surface, when the junction of branch migration is close enough to the surface. (2) Branch migration becomes slower than disassociation near the end of the reaction, resulting in disassociation prior to branch migration through the foot domain. Thus, a weaker sequence of the foot domain near the 3' end of the robot leads to a faster overall reaction rate because of faster disassociation. (3) A small difference in the standard free energy of the DNA sequence ( $\Delta G/\overline{\Delta G} = 1.1$  vs. 0.8 for each base pair) can result in a large difference in the rate of the robot taking a single step (half completion time  $\approx 15$  hours vs. 10 minutes).

Similarly, a reversible strand displacement reaction of the robot walking from one track location to another ( $\text{RTr1}[27] \rightleftharpoons \text{RTr2}[27]$ ) can be modeled with analogous hybridization, branch migration and disassociation steps (Fig. S3B). The disassociation rate constants are the same as discussed above:

$$\begin{aligned} k_{5d}^i &= 10^{6-i} /s \\ k_{3d}^i &= 10^{6-(2T+15-i)} /s \end{aligned}$$

Branch migration toward and away from the origami surface now both include an initiation step. To explore how the rate of initiation and the strength of the foot domains affect the overall speed of walking, we set the initiation rate constant to be a variable  $k_0$ , and the length of the foot domains in the robot strand to be a variable  $T$ , while keeping the track strands unchanged:

$$\begin{aligned} k_{5b}^i &= \begin{cases} 10^4 /s & i < T + 15 \\ k_0 & i = T + 15 \end{cases} \\ k_{3b}^i &= \begin{cases} k_0 & i = T \\ 10^4 /s & T < i \leq th - 6 + T \\ 10^{4-w(i-(th-6+T))} /s & i > th - 6 + T \end{cases} \end{aligned}$$

The energies of the beginning and end states shown in Fig. S3B should be approximately the same, as in both cases the robot is bound to its track by the same total number of base pairs and has similar geometric constraints. To satisfy detailed balance, the ratio between the product of all forward rate constants and that of all reverse rate constants for all pathways between any two given states should also be the same. Using these two requirements, all hybridization rate constants can be calculated based on  $k_{5h}^T$  and the disassociation and branch migration rate constants:

$$\begin{aligned} k_{5h}^i &= \begin{cases} 10^3 /s & i = T \\ \frac{k_{5h}^T \prod_{n=T}^{i-1} k_{3b}^n}{k_{5d}^T \prod_{n=T+1}^i k_{5b}^n} \times k_{5d}^i /s & i > T \end{cases} \\ k_{3h}^i &= \begin{cases} \frac{k_{3h}^{T+15} \prod_{n=i+1}^{T+15} k_{5b}^n}{k_{3d}^{T+15} \prod_{n=i}^{T+14} k_{3b}^n} \times k_{3d}^i /s & i < T + 15 \\ 10^{3-\sum_{n=1}^{20-th} n \times w} /s & i = T + 15 \end{cases} \end{aligned}$$

Before the initiation of branch migration ( $k_0$ ) becomes the rate limiting step, the overall reaction rate will still largely depend on the disassociation near the end of the reaction, and therefore the robot walks

at a fairly slow rate of roughly 5 min per step. Since the critical difference between the first and second step of branch migration is the presence of one versus two single-stranded tails at the branch point (56),  $k_0$  could potentially be increased from 5 /s to at least  $10^3$  /s by adding a few Ts at the 3' end of the track strands. Simulations suggest that, with an increased  $k_0$ , weaker foot domains (e.g. 2 to 4 nucleotides) could speed up walking by at least tens to hundreds of times (Fig. S3B).

The biophysics of the DNA robot performing random walking merits further theoretical and experimental study.



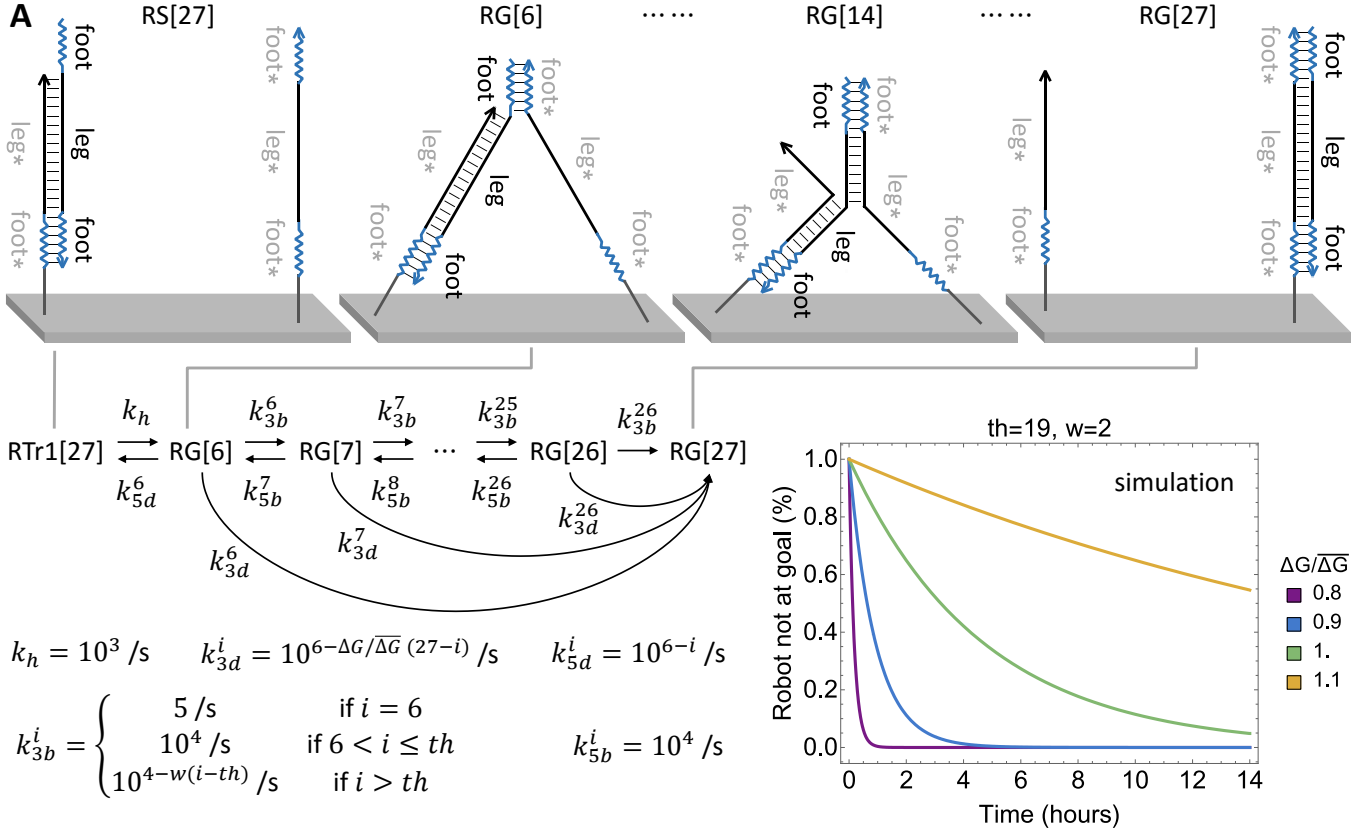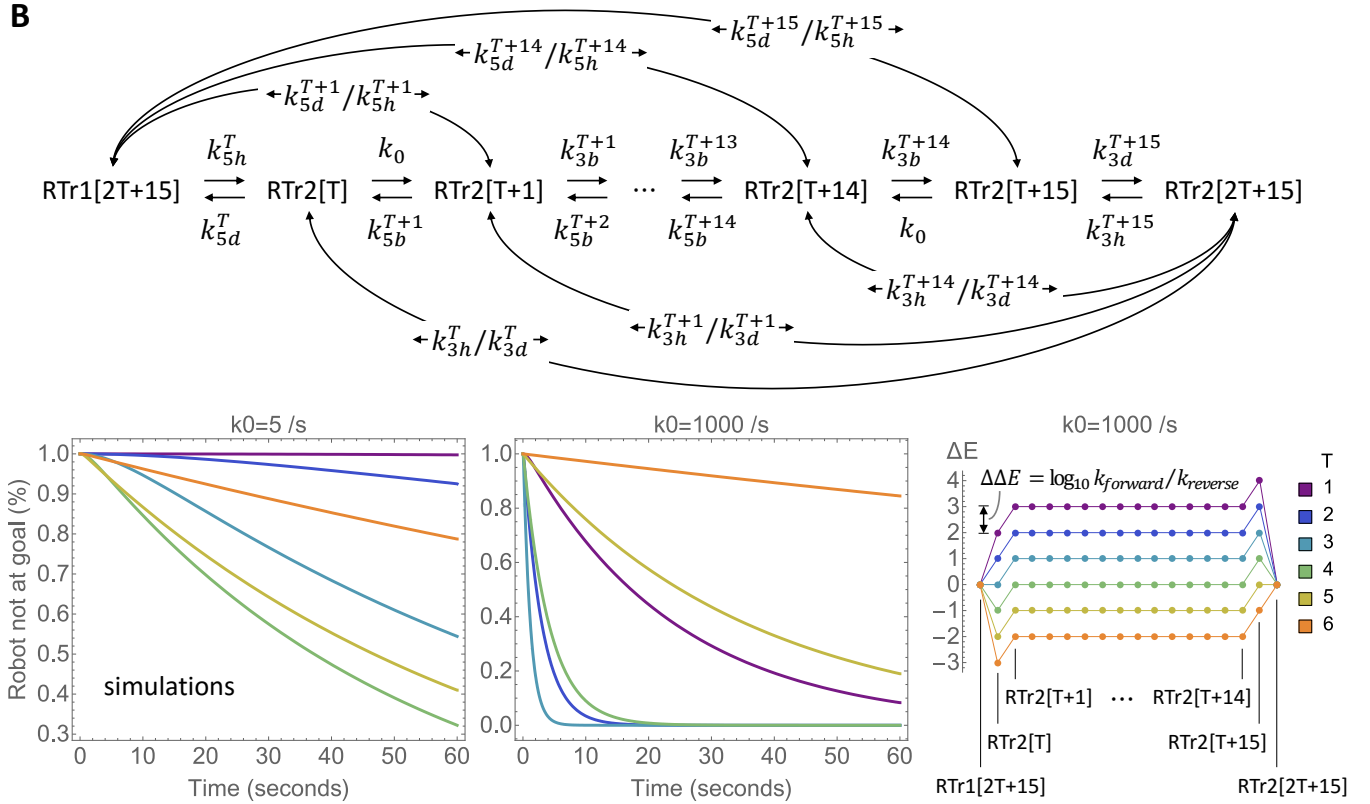

**Fig. S3. A biophysical model of the walking mechanism.** (A) Model and simulation of an irreversible pathway for the robot taking one step to reach the goal location. (B) Model of a reversible pathway for the robot taking one step from a track location to another, and simulations of two steps of walking to a goal, with  $th = 19$ ,  $w = 2$ , and toehold lengths ( $T$ ) from 1 to 6.

## 2.4 The purity of DNA origami affects the completion level of desired reactions

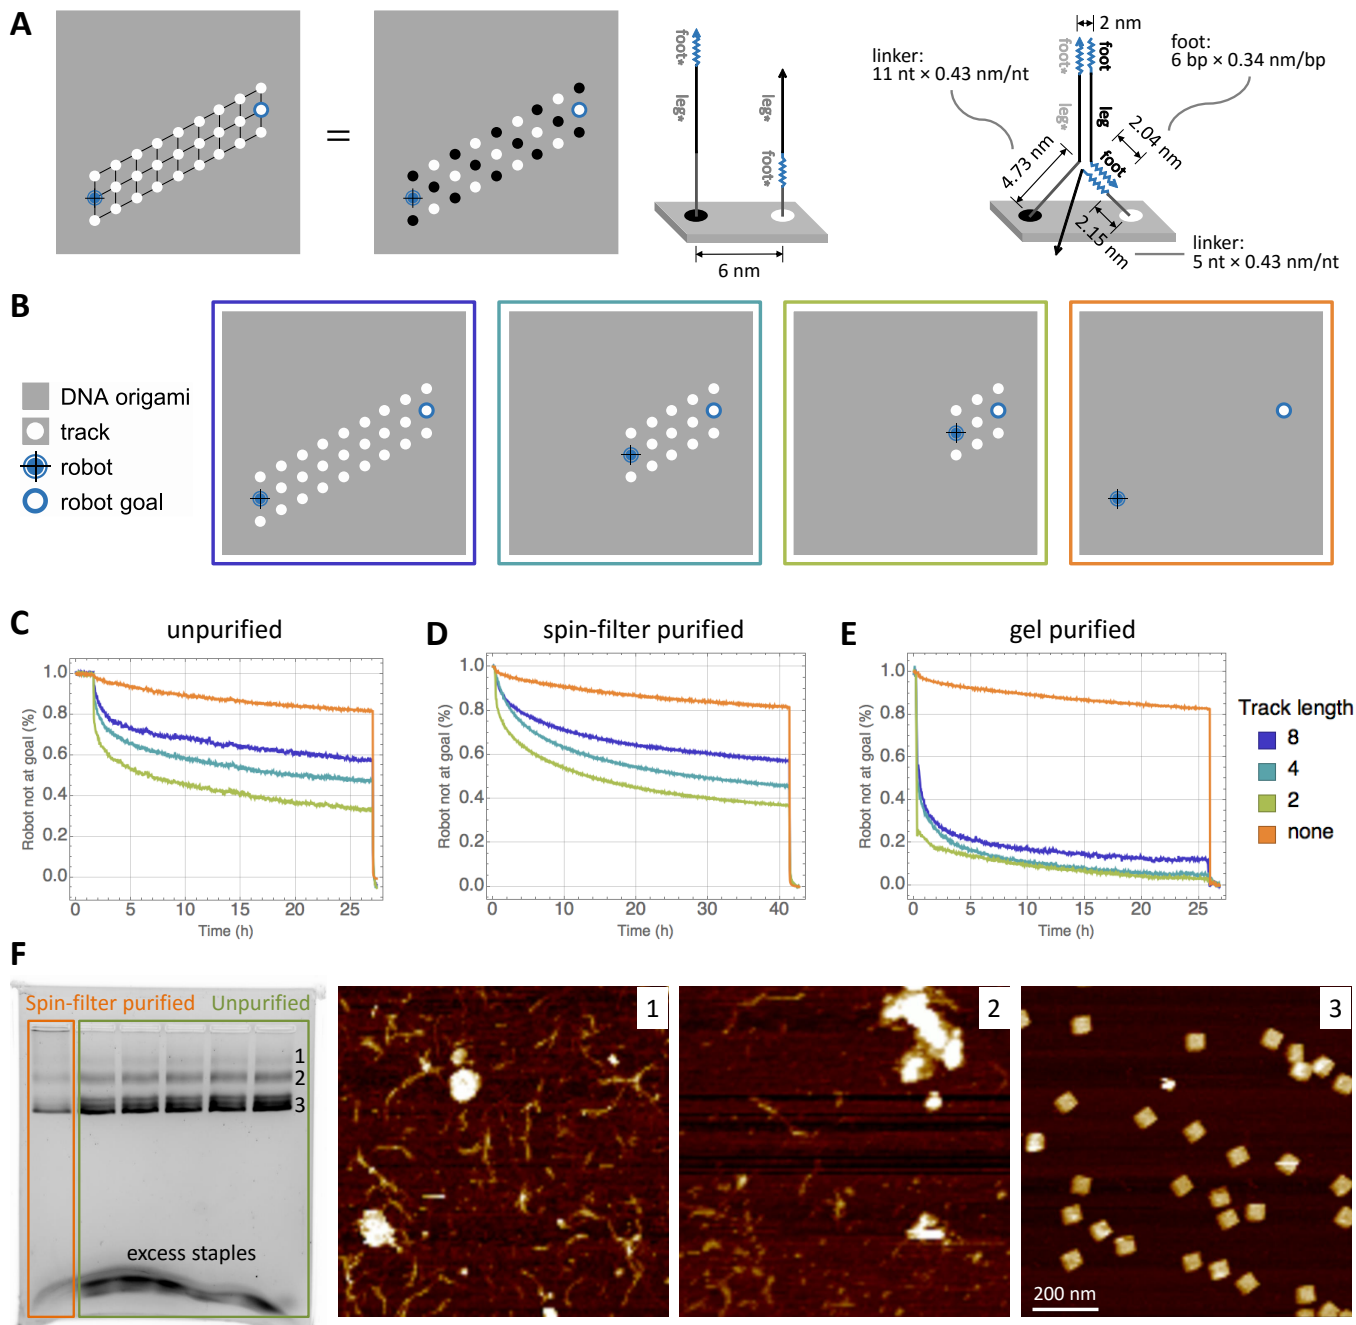

**Fig. S4. The purity of DNA origami affects the completion level of desired reactions.** (A) The checkerboard layout of two distinct types of track strands in all random-walking systems. The lengths (11 and 5 nt) of the linkers in the two types of track strands are designed to allow the robot to reach an adjacent track location:  $4.73 + 2 + 2.04 + 2.15 = 10.92 \text{ nm} > 6 \text{ nm}$ . (B) Schematic diagrams of the robot walking on linear tracks of three distinct lengths and a negative control with no track. Fluorescence kinetics data of the setup shown in A, using (C) unpurified, (D) spin-filter purified, and (E) gel purified double-layer DNA origami. (F) Spin-filter purified and unpurified origami on an agarose gel and AFM images of the three labeled bands extracted from the unpurified lanes on the gel. Band 3 was subsequently used for all gel-purified samples. To obtain enough DNA structures after gel purification, we used five lanes of the same unpurified sample. We assumed that the three bands in the spin-filtered lane had the same types of DNA structures shown in the AFM images, because the locations of the bands were identical compared to the unpurified lanes. The scale bar applies to all three images.

## 2.5 Numerical analysis of the random walk

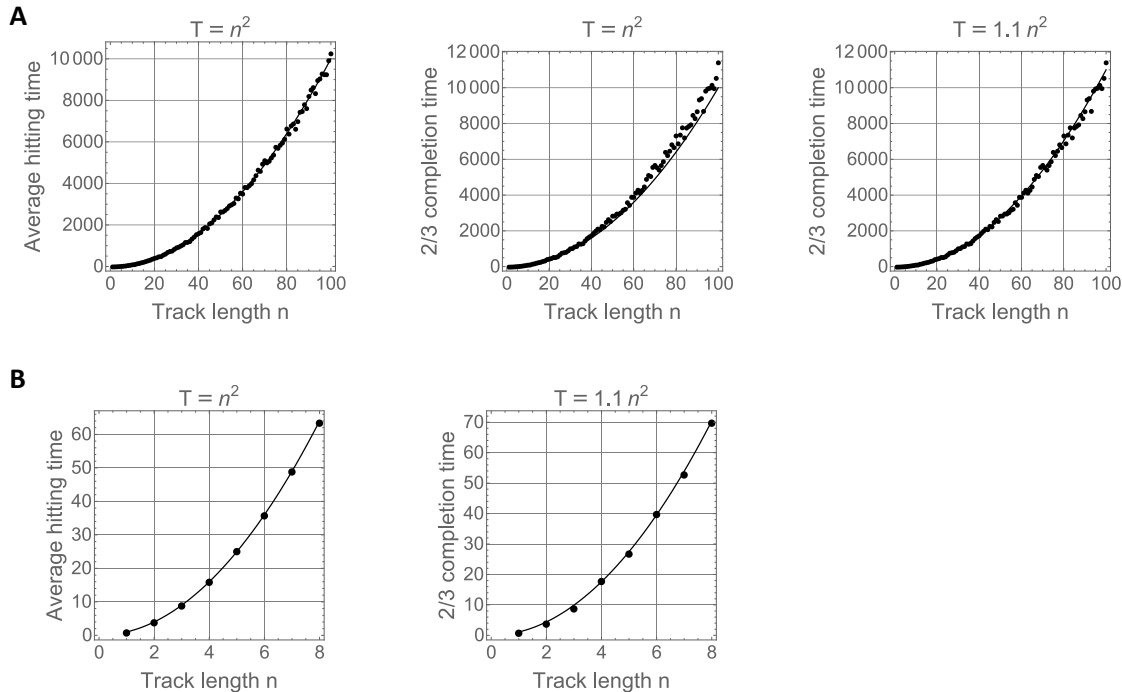

**Fig. S5. Numerical analysis of the random walk.** Average hitting time and two-thirds completion time of random walks on linear tracks of lengths 1 to  $n$ , with (A)  $n = 100$  and 1,000 trials for each track length, and (B)  $n = 8$  and 10,000 trials for each track length. The linear track consists of sites  $0, 1, 2, \dots, n$ . The random walk starts at site 0. For any site  $0 < i < n$ , the random walk moves to  $i - 1$  or  $i + 1$  with equal probability. If the random walk returns to 0, it continues to 1. The hitting time is defined as the number of steps for the random walk to hit site  $n$  for the first time. The average hitting time is the mean of the hitting time for all trials. The two-thirds completion time is the smallest number of steps that is greater than or equal to the hitting time for two-thirds of all trials.

The average hitting time (also referred to as the first-passage time) of a random walk on a linear track has been well studied (31, 57). However, the average hitting time cannot be directly read off from experimental data, unlike the related notions of the fractional completion times, such as the half-completion time (i.e. the median hitting time) and the two-thirds completion time. For random walks in general, these quantities can behave quite differently and we are not aware of direct mathematical relationships that allow calculating one from the other. Therefore, we performed numerical simulations of one-dimensional random walks to establish that, in the case relevant to our experimental investigations, the two-thirds completion time scales quadratically with the track length, just like the average hitting time.

For track lengths  $n = 1$  to 100, numerical simulations of 1,000 trials per track length confirmed that the average hitting time  $T$  is quadratically related to  $n$  (Fig. S5A, left). The two-thirds completion time is fairly similar to the average hitting time (Fig. S5A, middle), but can be better estimated as  $T = 1.1n^2$  (Fig. S5A, right). Taking a closer look at track lengths  $n = 1$  to 8 (which are the lengths used in our random walk experiments) with numerical simulations of 10,000 trials per track length,  $T = n^2$  is practically an exact function for the average hitting time while  $T = 1.1n^2$  remains a very good estimate for the two-thirds completion time (Fig. S5B). Thus, we concluded that it is reasonable to apply a quadratic fit to the two-thirds completion time extracted from the experimental data, and use that to determine the rate constants in the mass action simulation of the reactions involved in our random walk system.

## 2.6 Cargo pick-up

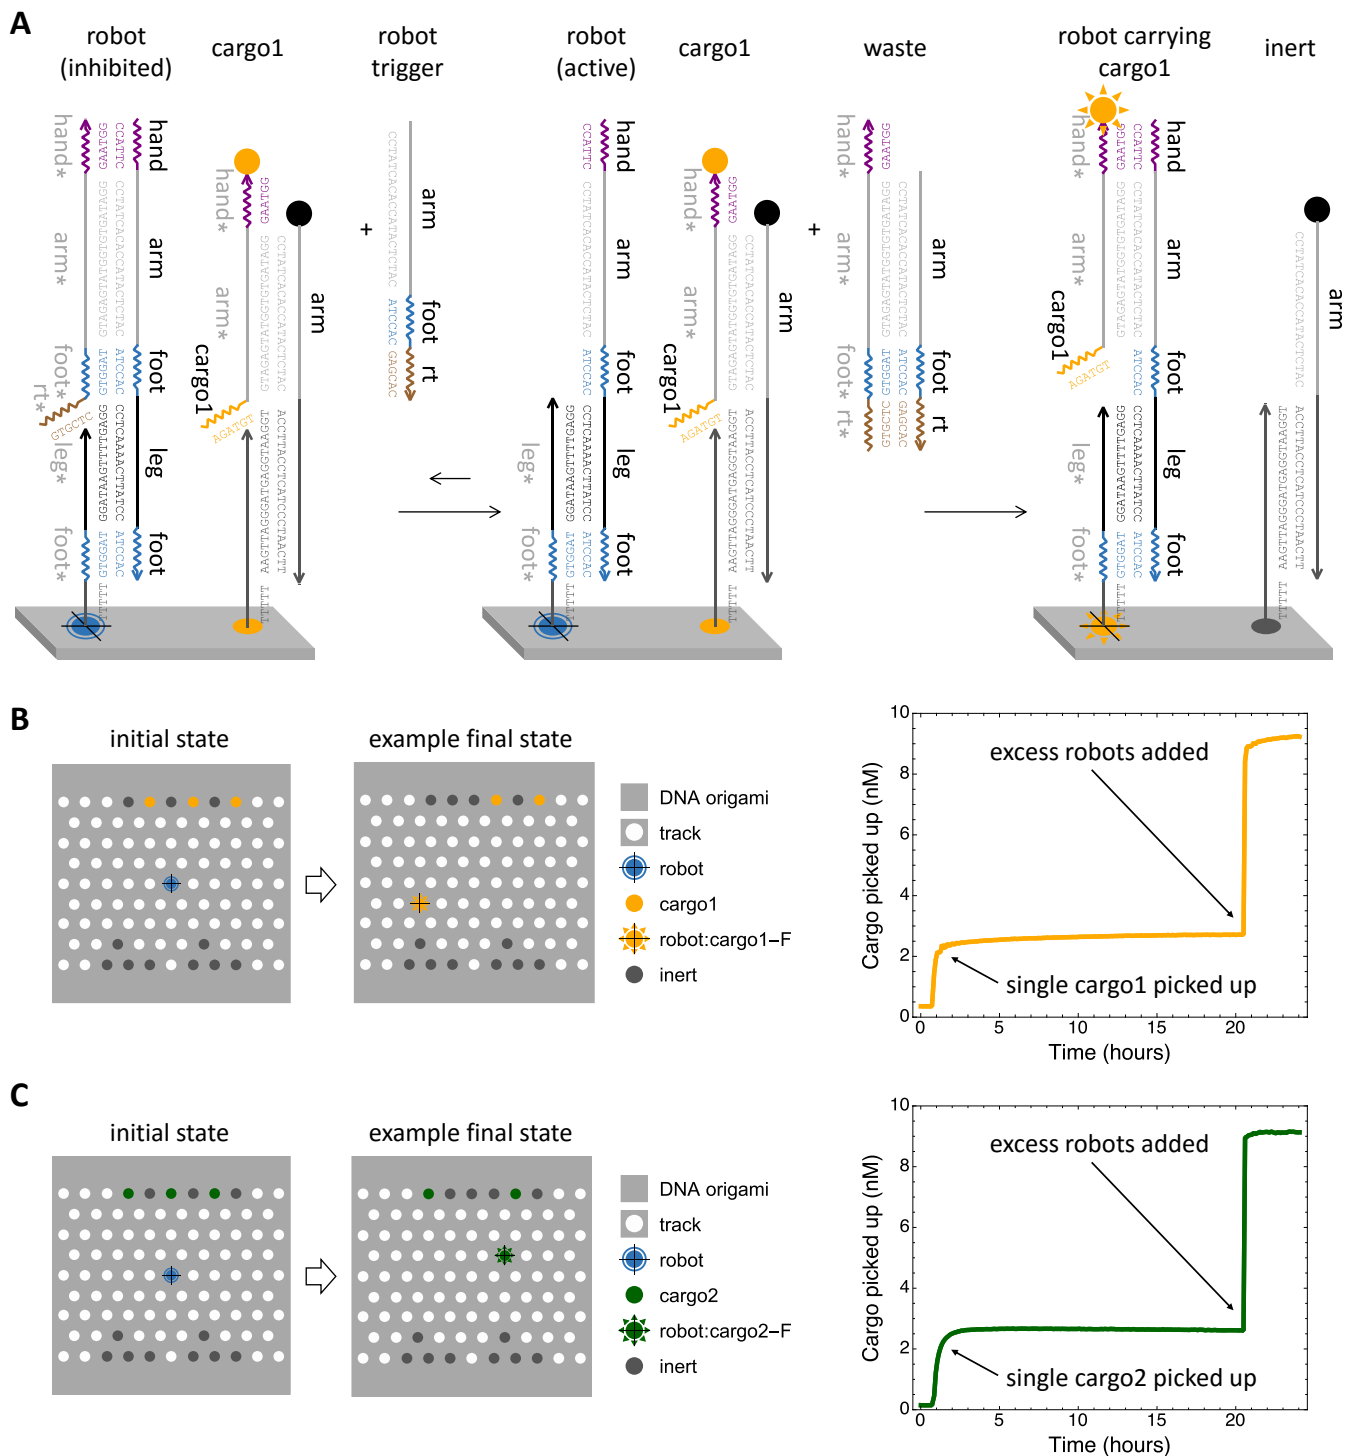

**Fig. S6. Cargo pick-up.** (A) Sequence-level diagram of the mechanism of the robot picking up a cargo after being triggered. The processes of cargo pick-up are identical for both types of cargos, and the only difference is the sequence of the cargo domain on the cargo strand. Two distinct sequences, AGATGT and GAAAGG, are assigned to cargo1 and cargo2 domains, respectively. Schematic diagram and fluorescence kinetics data of the robot picking up (B) cargo1 and (C) cargo2. The cargo strands are labeled with a fluorophore and cargo attacher strands are labeled with a quencher. When a cargo is picked up from its initial location, the fluorescence signal increases.

## 2.7 Procedure for preparing cargo-sorting samples

Step 1: anneal origami with excess staples and cargo strands.

Step 2: gel purify origami and remove excess staples and cargo strands.

Step 3: incubate origami with excess inhibited robot and goal complexes.

Step 4: spin filtrate origami and remove excess robot and goal complexes.

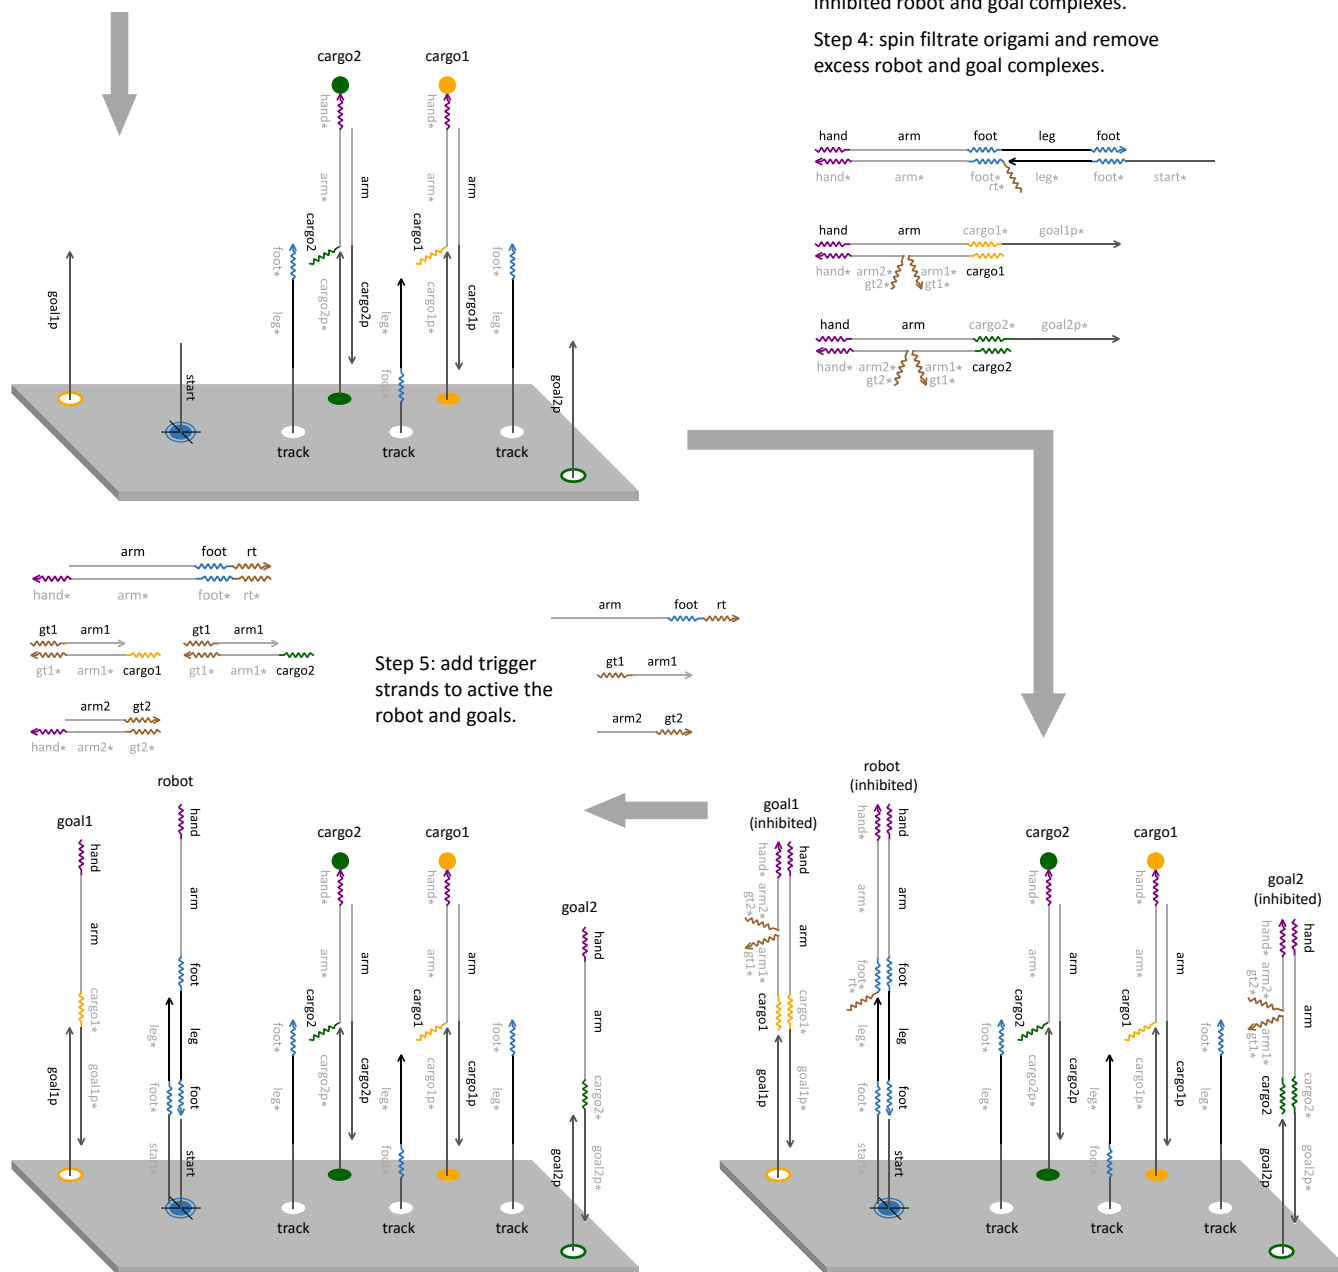

**Fig. S7. Procedure for preparing cargo-sorting samples.** Step 1: anneal origami with a 10-fold excess of the regular, track, robot start, cargo and goal staples, 11-fold excess of the cargo attacher strands, and 12-fold excess of the cargo strands. Step 2: gel purify origami to remove malformed structures, and excess staples and cargo strands. Step 3: incubate origami with an approximately 2-fold excess of gel-purified inhibited robot and goal complexes, assuming a 50% yield from gel purification. Step 4: spin filtrate origami to remove excess robot and goal complexes. Step 5: add a 20-fold excess of trigger strands to activate the robot and goals. For more details see materials and methods.

## 2.8 Negative control for cargo sorting without a robot

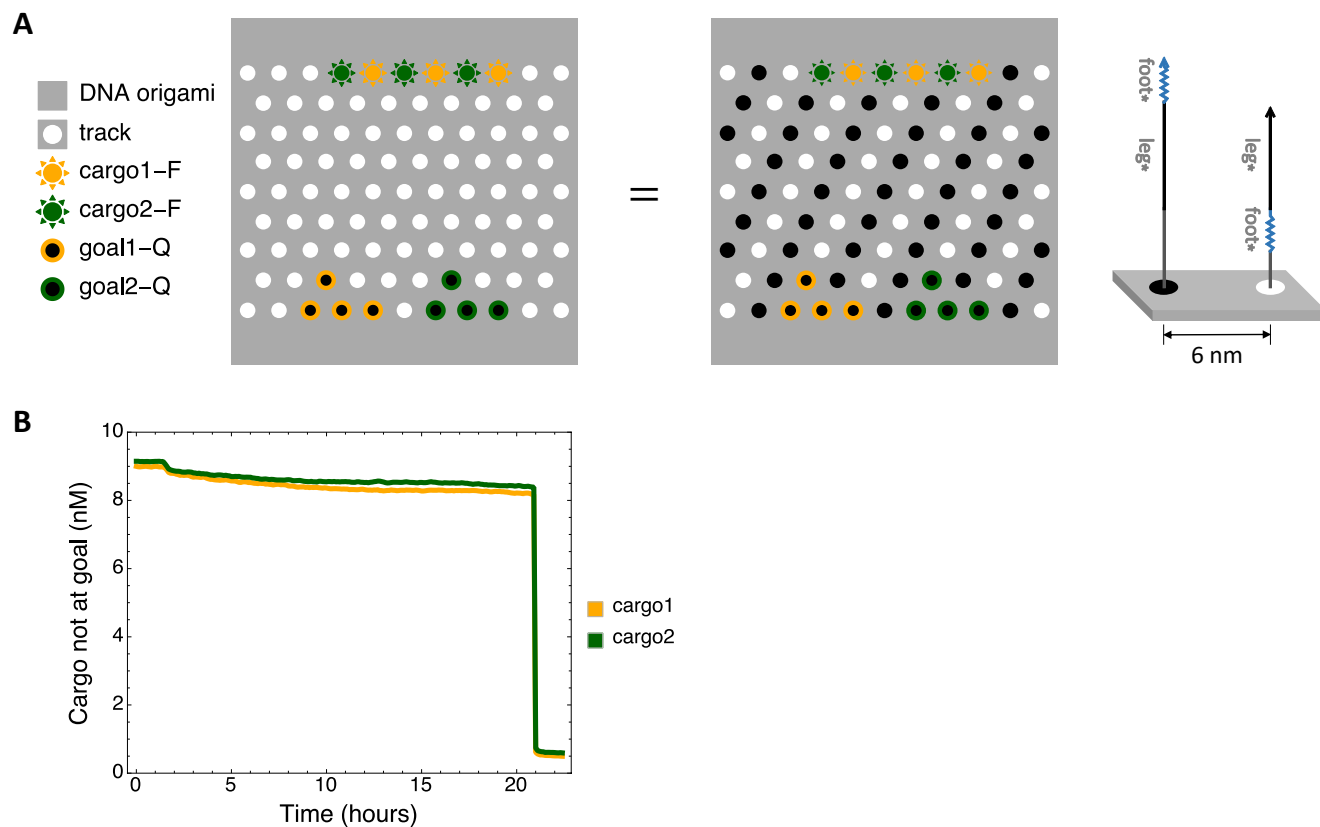

**Fig. S8. Negative control for cargo sorting without a robot.** (A) Schematic diagram of the negative control experiment, and the checkerboard layout of two distinct types of track strands in all cargo-sorting systems. (B) Fluorescence kinetics data of the negative control experiment. The two types of cargos are labeled with two distinct fluorophores, and the two types of goals are both labeled with a quencher. When a cargo is dropped off at a goal location, the fluorescence signal decreases.

## 2.9 Procedure for preparing cargo-sorting samples for AFM imaging

Initial state of the cargo-sorting experiment with one type of cargo and two types of goals.

Final state of the cargo-sorting experiment with one type of cargo and two types of goals.

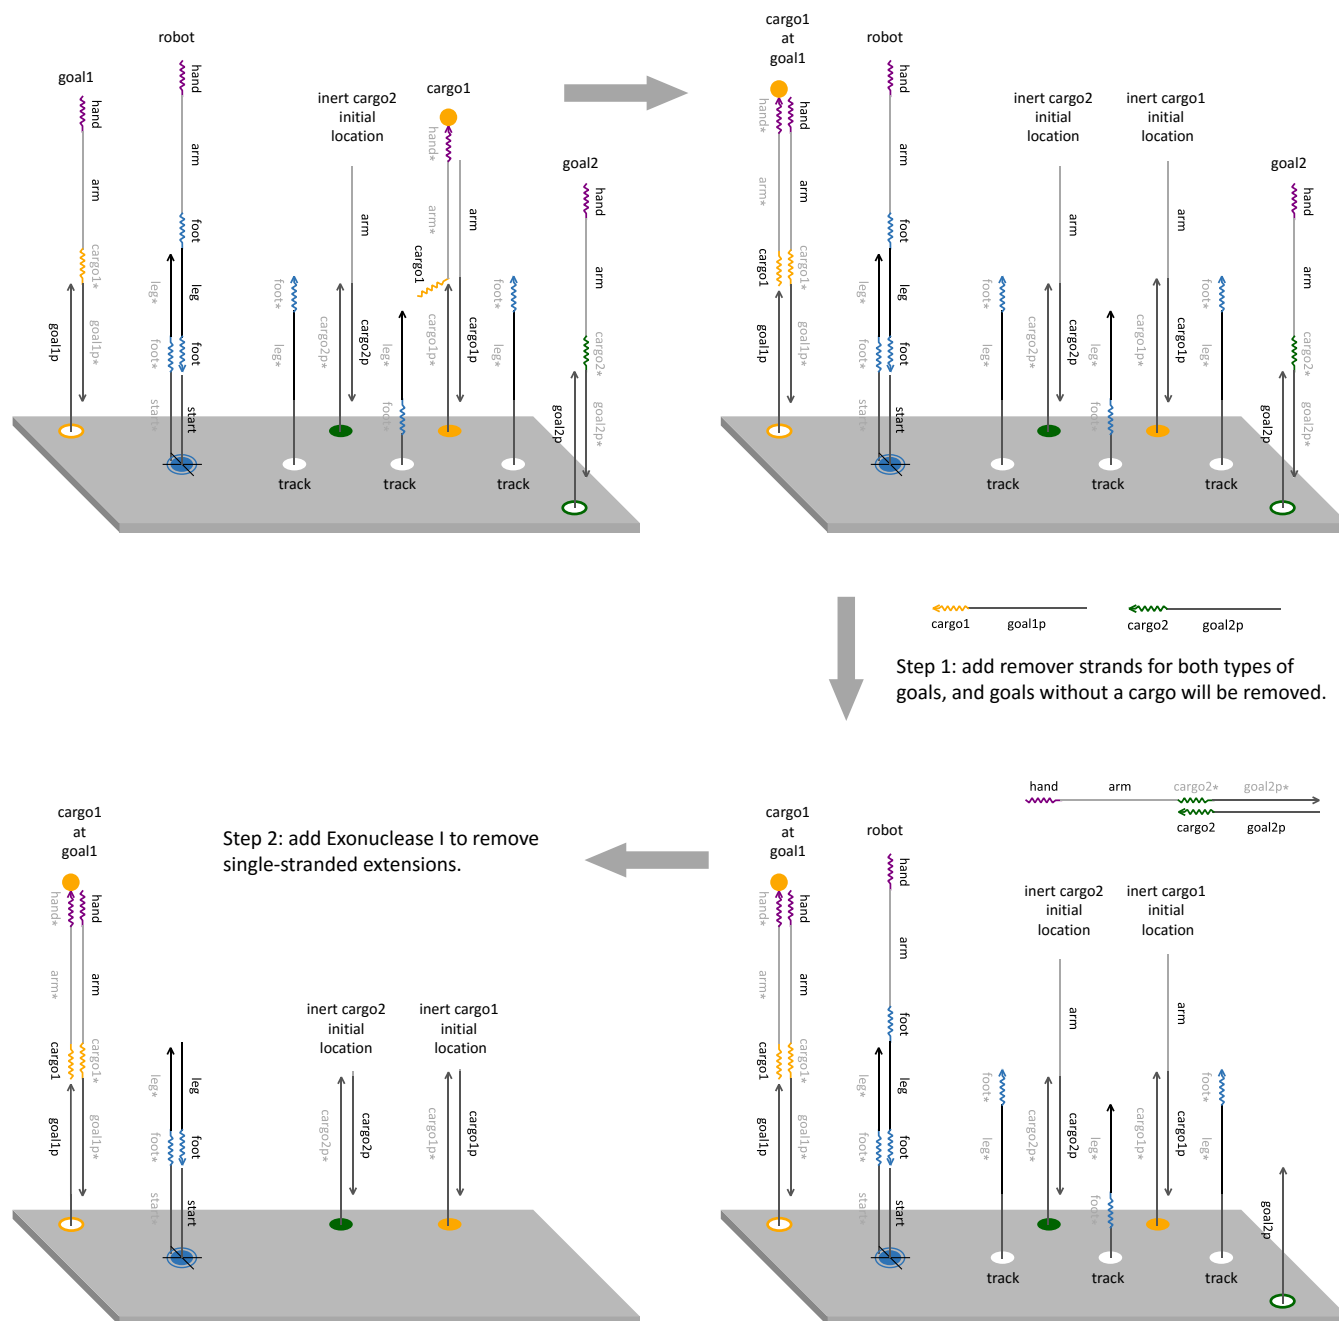

**Fig. S9. Procedure for preparing cargo-sorting samples for AFM imaging.** The initial locations of both cargo types are used as a reference for recognizing the orientation of origami in AFM images. Step 1: add a 20-fold excess of remover strands for both types of goals to remove goals without a cargo. Step 2: add Exonuclease I to remove single-stranded extensions and create a clean background for imaging the locations of the cargos at goals. For more details see materials and methods.

## 2.10 AFM images of the cargos at their initial locations and destinations

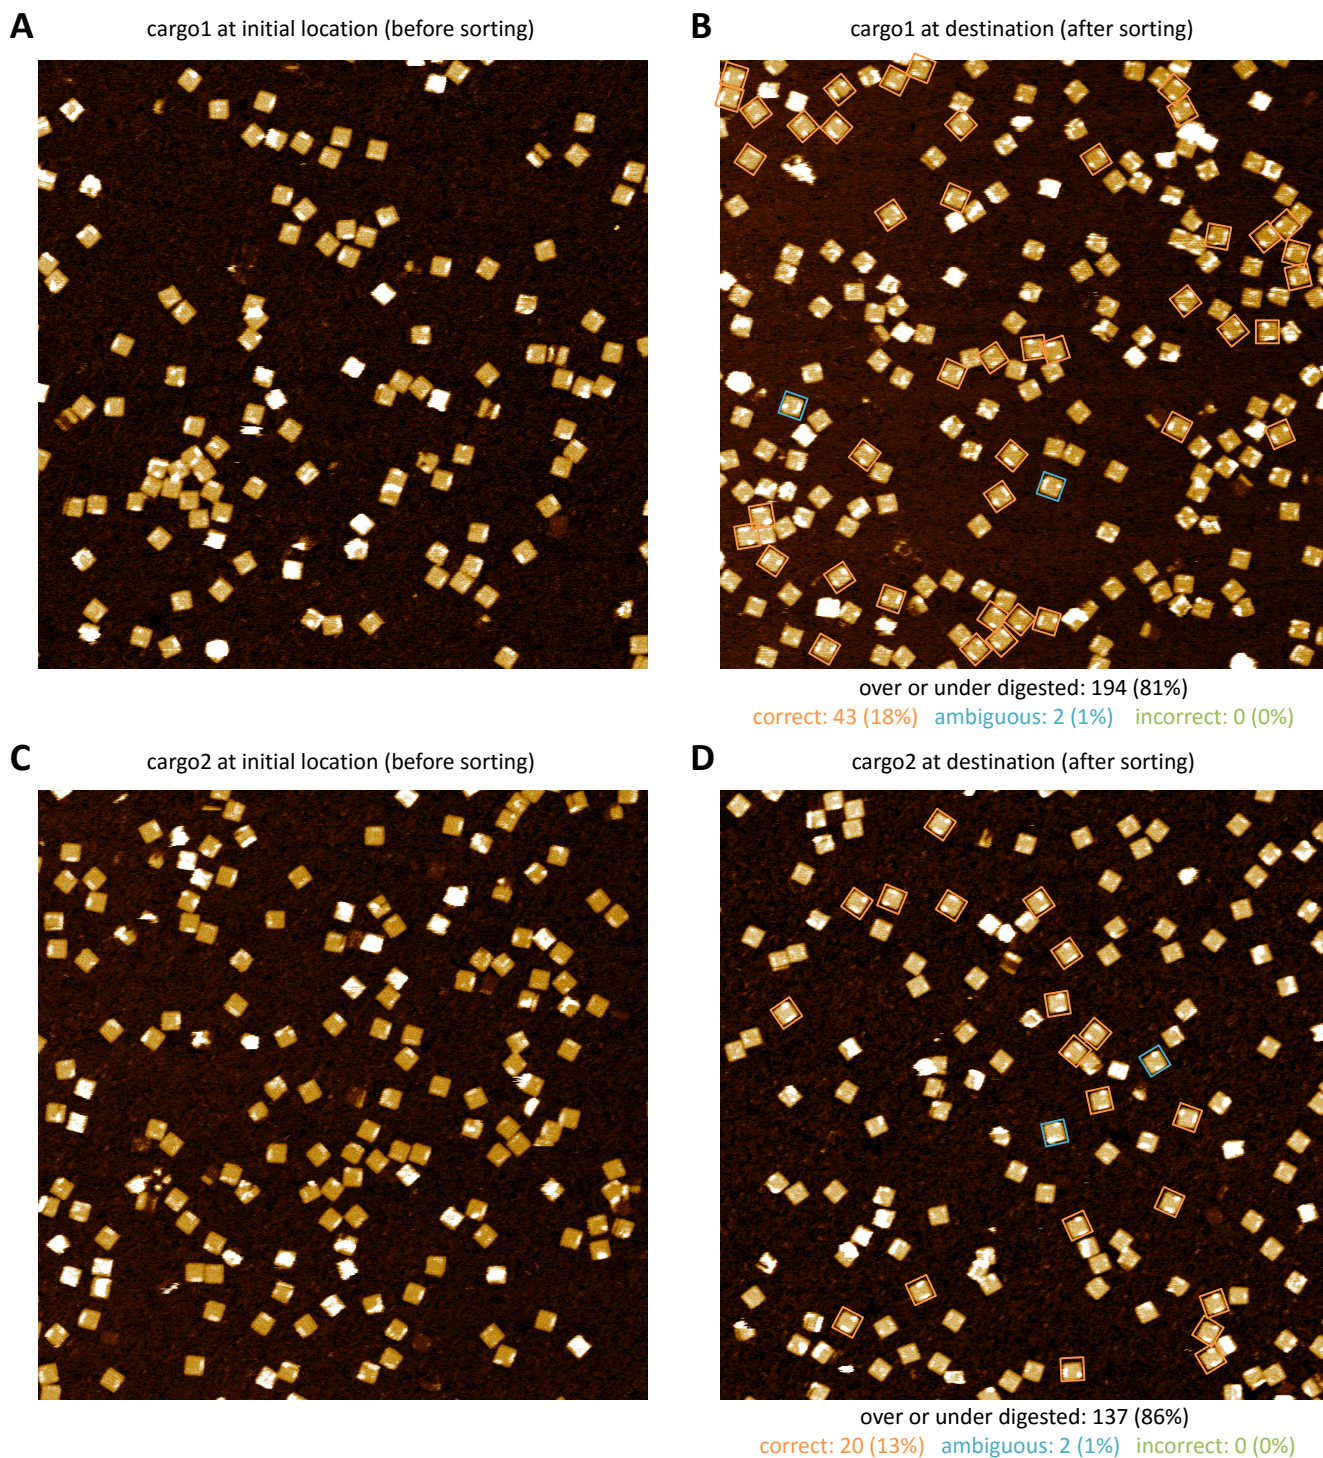

**Fig. S10. AFM images of the cargos at their initial locations and destinations.** (A) Cargo1 at initial location. (B) Cargo1 at destination. (C) Cargo2 at initial location. (D) Cargo2 at destination. All AFM images are  $2 \text{ by } 2 \mu\text{m}$  in size. If an origami does not have clearly recognizable molecules both at the initial location and at either of the two destinations, it is classified as *over or under digested* by Exonuclease I. Otherwise there are three situations: If the destination looks like the correct one (i.e. goal1 for cargo1 or goal2 for cargo2), it is classified as *correct*. If it is hard to tell whether the destination looks correct (for example, because the lack of clear asymmetry of the molecules at the initial location), it is classified as *ambiguous*. If the destination looks like the incorrect one (i.e. goal2 for cargo1 or goal1 for cargo2), it is classified as *incorrect*.



## 2.11 Cargo sorting with mixed populations of DNA origami

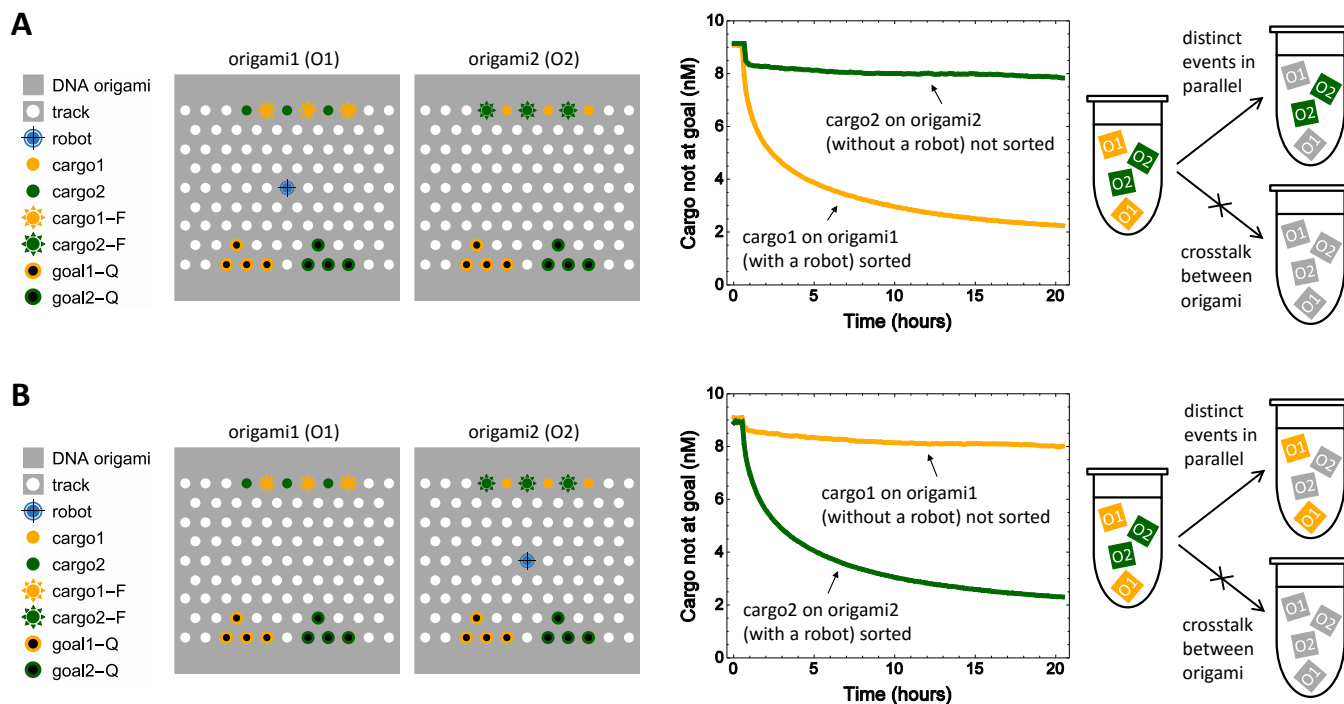

**Fig. S11. Cargo sorting with two mixed populations of DNA origami, one with a robot and the other without.** Schematic diagram and fluorescence kinetics data of (A) origami1 with a robot and origami2 without, and (B) origami2 with a robot and origami1 without. Origami1 has cargo1 labeled with a fluorophore and cargo2 left unmodified. Origami2 has cargo2 labeled with a fluorophore and cargo1 left unmodified. If the robot stays on the origami on which it is initially placed, the sorting of one type of cargos will be detected but not the other.

## 2.12 Analysis of the completion levels in the cargo-sorting experiments

The explanations for the linear model, from top to bottom in Supplementary Fig. S12A, are the following:

In the experiment shown in Supplementary Fig. S8, because there is no robot, the only possible reaction that yields a decreased fluorescence signal should be a goal on one origami picking up a cargo on another.

In the pair of experiments shown in Fig. 3B, the completion levels of the desired cargo-sorting reactions tell us the maximum fraction of cargos that can be correctly sorted and the baseline of zero.

In the pair of experiments shown in Fig. S11, there are two populations of origami: one has a robot (origami1) and another does not (origami2). Only one type of cargo is labeled with a fluorophore on each type of origami, but both types of goals have a quencher. If a robot moves from origami1 to origami2, the monitored type of desired cargo sorting on origami1 will decrease because the same type of cargo on origami2 does not have a fluorophore. A robot or goal on origami1 picking up a cargo on origami2 should not affect the completion level — since we have four goals and an average of three cargos per type per origami, an additional cargo would just occupy the extra goal location, either after this transfer or after subsequent transfers. A goal on origami2 picking up a cargo on origami1 should not affect the completion level either, because the goal on origami2 also has a quencher and it is no different from the goal on origami1. Simultaneously, the monitored type of undesired cargo sorting on origami2 will increase if a robot moves from origami1 to origami2 and start sorting the cargos, or if a robot or goal on origami1 picks up a fluorophore-labeled cargo on origami2.

In the experiment shown in Fig. 4A, there are also two populations of origami: only one type of cargo is labeled with a fluorophore on each type of origami, and only the corresponding type of goal has a quencher. If a robot or goal on one type of origami picks up a fluorophore-labeled cargo on the other type of origami, there will be no signal change since the corresponding goal has no quencher. Because both types of origami already have a robot, an additional robot moved from another origami should not affect the completion level of the desired cargo sorting. Loosing a robot to another origami should occur much slower than the desired local cargo sorting reactions, and will not affect the completion level if the event takes place after the cargos are already sorted on the original origami.

**A**

|          | Completion level of cargo1 (%) | Completion level of cargo2 (%) | Linear model  |
|----------|--------------------------------|--------------------------------|---------------|
| Fig. S8  | 8.65                           | 7.85                           | $z$           |
| Fig. 3B  | 79.02                          | 81.15                          | $max$         |
|          | 2.72                           | 0.88                           | $0$           |
| Fig. S11 | 75.16                          | 74.07                          | $max - x$     |
|          | 12.11                          | 14.09                          | $x + y + z$   |
| Fig. 4A  | 62.29                          | 64.49                          | $max - y - z$ |

**B**

|                                                  |     | Completion level (%) |
|--------------------------------------------------|-----|----------------------|
| Robot moving from one origami to another         | $x$ | 1.59                 |
| Robot on one origami picking up cargo on another | $y$ | 4.56                 |
| Goal on one origami picking up cargo on another  | $z$ | 8.25                 |

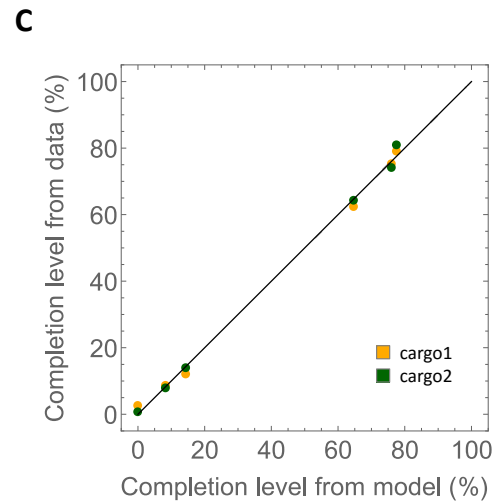

**Fig. S12. Analysis of the completion levels in the cargo-sorting experiments.** (A) Completion levels at the 20-hour time point from the experimental data, and our interpretation of the completion levels in a linear model for analyzing undesired inter-origami interactions. (B) The definition of the variables in the model, and the values from a linear least-squares fit using the four variables and twelve data points.  $max$  was fitted to be 77.5%. (C) Comparison between the model and the data.

## 2.13 Multiple robots collectively performing a cargo-sorting task

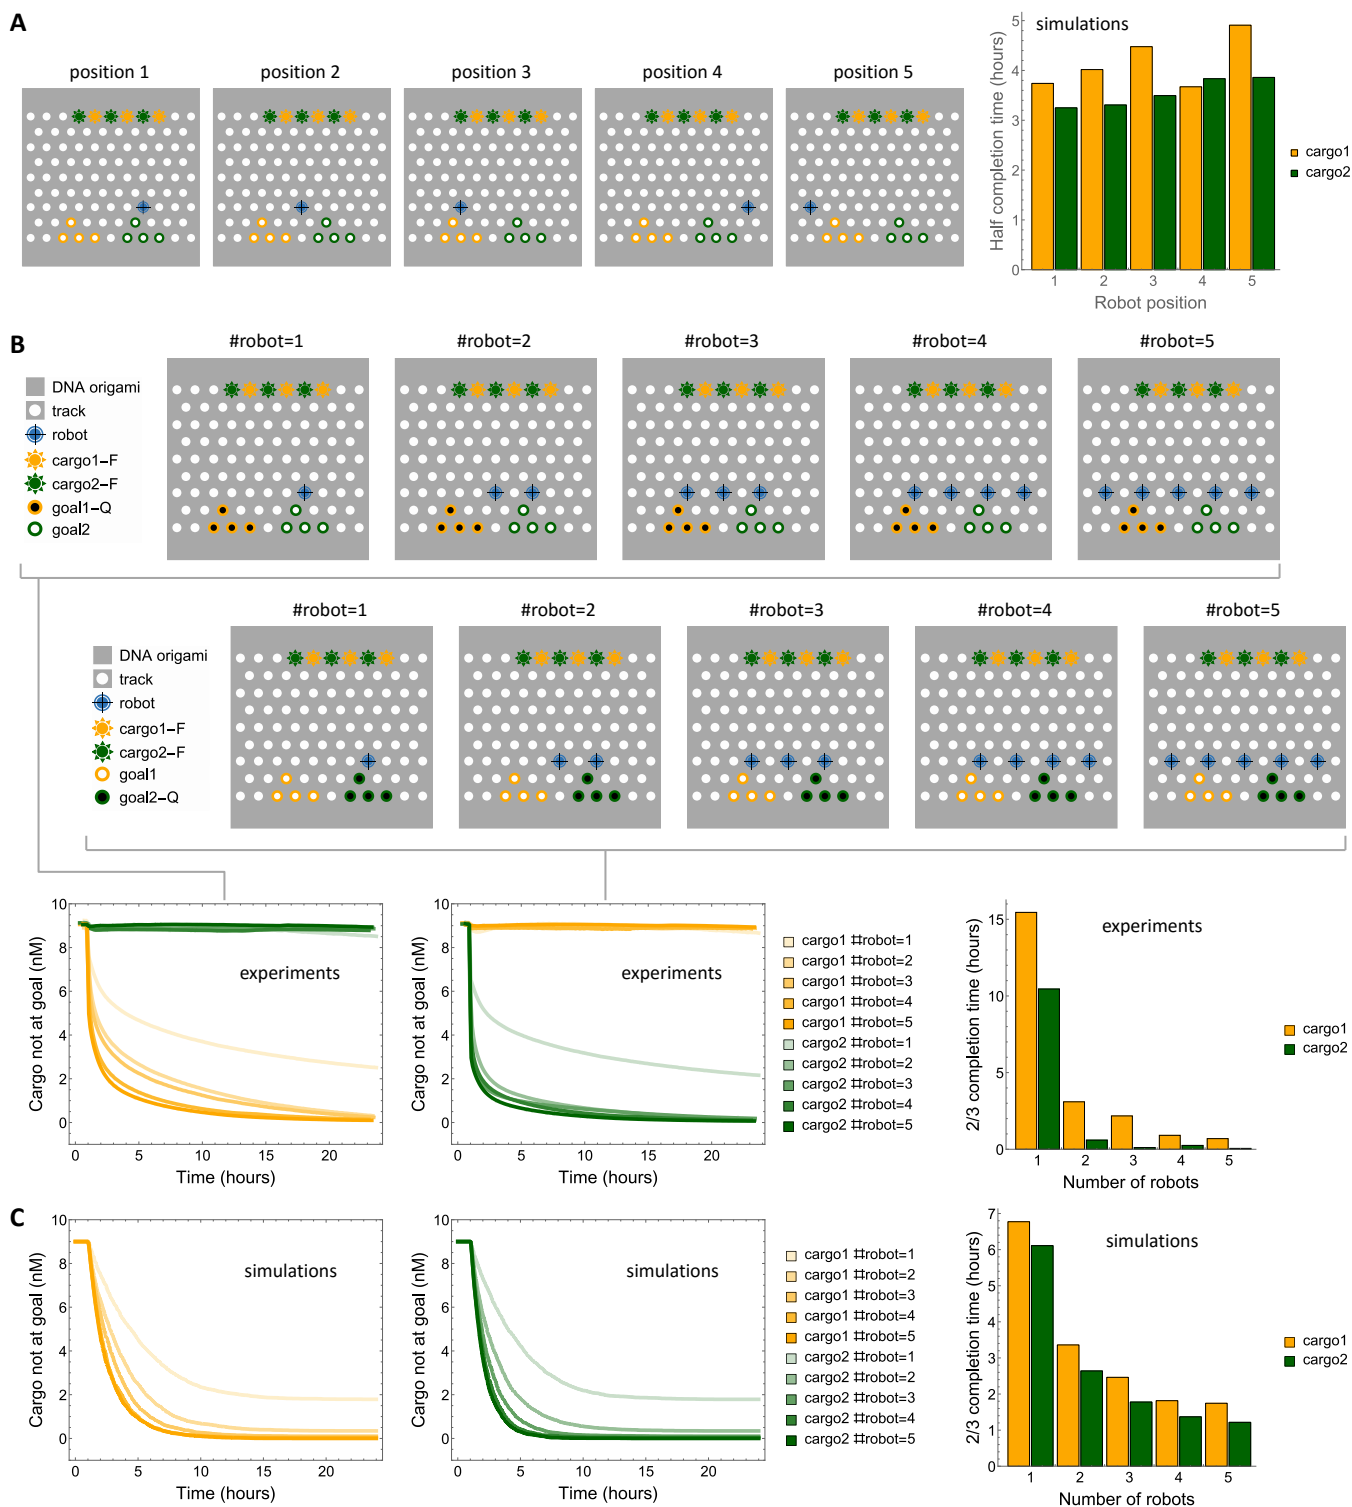

**Fig. S13. Multiple robots collectively performing a cargo-sorting task.** (A) Simulations of cargo sorting with a single robot at five distinct initial locations. The robots are ranked on how long it takes for them to sort the cargos, from the fastest to the slowest. (B) Design diagrams and fluorescence kinetics data of cargo sorting with one to five robots. (C) Simulations with each robot being present with a 80% probability. In each case, the additional robot is predicted to be slower than the existing robot(s), so we know that the increased overall speed for cargo sorting is caused by the collective behavior of the robots.

### 3 Cadnano diagram

#### 3.1 Double-layer square DNA origami design

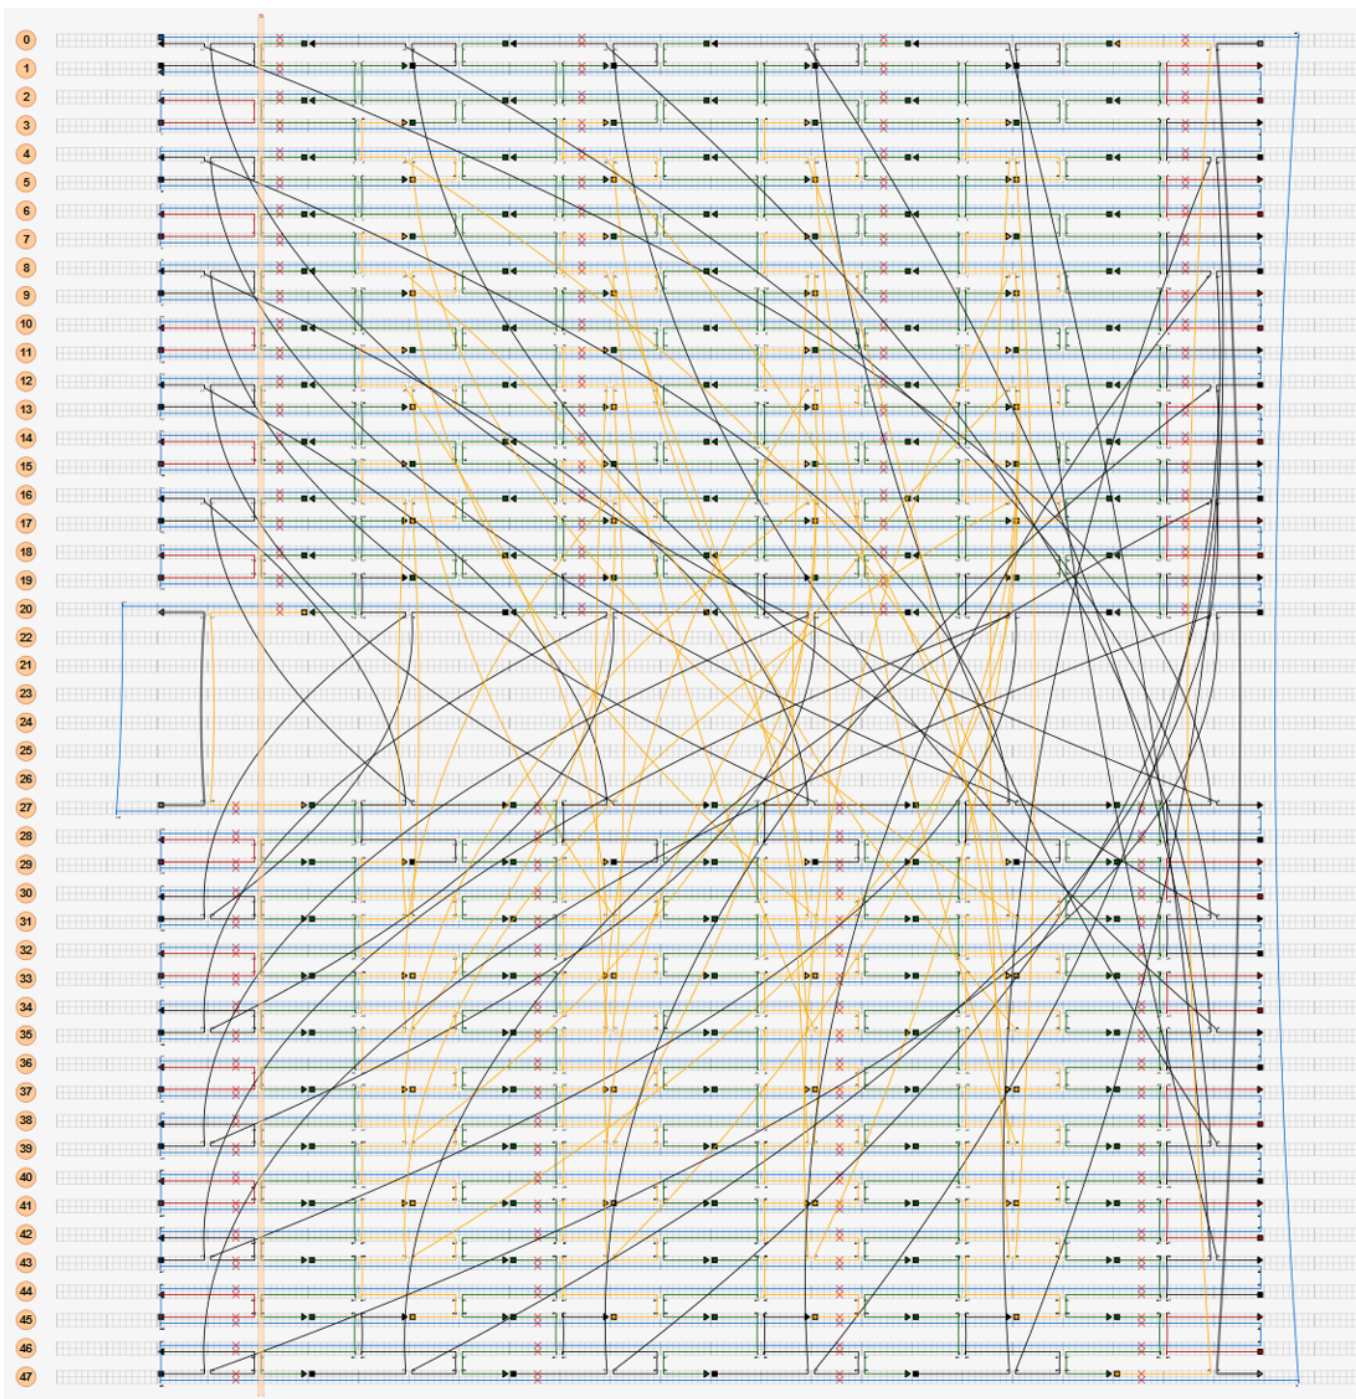

Fig. S14. Double-layer square DNA origami design.

## 4 DNA sequences

### 4.1 Staples

Table S1: Staples in the double-layer square DNA origami.

| Name      | Sequence                                          |
|-----------|---------------------------------------------------|
| T C01 R01 | GGGCGATGGCCCACTAGAAAAACCAACGGGGT                  |
| T C01 R02 | AACGGTACGCCAGAATAGGGATTTAGACAGG                   |
| T C01 R03 | AAGAATACGTGGCACATCTGACCTATGATACAGGAGTGTA          |
| T C01 R04 | TTGAGGATTTAGAAGTTC AATAGATAATACAT                 |
| T C01 R05 | ATAACGGATTTCGCCTGTACATCGGCCGTTCCAGTAAGCG          |
| T C01 R06 | TAGGTTGGGTTATATATTTTTAACCTCCGGCT                  |
| T C01 R07 | GTACCGACAAAAGGTAAATAAGAGAGCCAGAATGGAAAAGC         |
| T C01 R08 | CGGGAGGTTTTGAAGCCGAACCTCCCGACTTG                  |
| T C01 R09 | AACAATGAAATAGCAAAAATAATAATGATATTCACAAAACAA        |
| T C01 R10 | GGTGAATTATCACCGTGA AATTATTCATTAAA                 |
| T C02 R01 | AAAGGGCCGTGAACCATCACCCAGGAGGC                     |
| T C02 R02 | CGATTAACCTGAGAAGTGTTTTGAGAGATA                    |
| T C02 R03 | GAACCCTGACAATATTTTTGAAAATAGATT                    |
| T C02 R04 | AGAGCCGATTAGACTTTACAAAAGTAACAG                    |
| T C02 R05 | TACCTTTATTGCTTTGAATACCGTCTGAGA                    |
| T C02 R06 | GACTACCACTATAITGTA AATGCCATTTTCG                  |
| T C02 R07 | AGCCAGTAAGTAATTCTGTCCACGCGAGGC                    |
| T C02 R08 | GTTTTAGCTTAAATCAAGATTAAATTGAGT                    |
| T C02 R09 | TAAGCCCTAGCTATCTTACCGAAGGTAAAT                    |
| T C02 R10 | ATTGACGCACCGACTTGAGCCACACCCCTCA                   |
| T C02 R11 | GAGCCGCCACCAGAAAGGAGGTTGAGGCAG                    |
| T C03 R01 | TTTTTTGGTTAAAGAATTCGGTTCG                         |
| T C03 R02 | GTGAGGCCAGAGCGGGAGCTAAAAAATCAAG                   |
| T C03 R03 | AGTCTTTAGGGACATTCAACAACCCCTCATAGTTAGCGTACAATAGGA  |
| T C03 R04 | CAACTCGTAGGAGCACTAACA AACTTGCTATT                 |
| T C03 R05 | AAATCGCGGTCAGATAGCTTGATCGTCTTTCCAGACGCCACCACC     |
| T C03 R06 | ATCCAATCTTTATCAAAAATCATAGAAGTTACA                 |
| T C03 R07 | CAATAAACGTAATTTAATCAGCTTCTGTATGGGATTTTGCAACCCGCCA |
| T C03 R08 | TTTGCACCTCCGGTATTCTAAGAAGACGACGA                  |
| T C03 R09 | TTAAGAAAAGAGATAACTCCAAAAAGTTTCAGCGGAGTGATACTCAGG  |
| T C03 R10 | TTAGAGCCCCGATTGAGGGAGGGAAGCCCTTT                  |
| T C04 R01 | GTCCACTAGGTCGAGGTGCCGTA AACTTTCCCTC               |
| T C04 R02 | GTTAGAATACCGAGTAAAAGAGTCACGACCAG                  |
| T C04 R03 | TAATAAAAAATGCGCGAACTGATAGTATCTAAA                 |
| T C04 R04 | ATATCTTTATTAAATCCTTTGCCCAGATTTTC                  |
| T C04 R05 | AGGTTTAACAGAGGCGAATTATTCAAGAGTCA                  |
| T C04 R06 | ATAGTGAAGCAAGACAAAAGAACGCTTAACAAC                 |
| T C04 R07 | GCCAACATAACATGTT CAGCTAATAGATATAG                 |
| T C04 R08 | AAGGCTTACAGCTACAATTTTATCTGAGCGCT                  |
| T C04 R09 | AATATCAGAGTAAGCAGATAGCCGAAAAGGGCG                 |
| T C04 R10 | ACATTCAAAGCAAAAATCACCAGTAGCCACCCT                 |
| T C04 R11 | CAGAACCGCCACCCTCTTTTTCACTAAAAGGAATTGCGA           |
| T C05 R01 | AATCGGAATGTTGTTT CATTACAGG                        |
| T C05 R02 | CACGCAAAAGCACGTATAACGTGAGCACTA                    |
| T C05 R03 | ACATCGCCAGATTCACCGTTAATAGAAAAGAGGACAGATGATCCGCGAC |
| T C05 R04 | ATTAATTTGGAATTGAGGAAGGTCCCTAAA                    |
| T C05 R05 | TTACCTGAATAAAAGAATACCAGTGCGCATAGGCTGGCTTTGTATCA   |

| Name      | Sequence                                           |
|-----------|----------------------------------------------------|
| T C05 R06 | CTTTTTTCAGATTAAGACGCTGAGATTTCAA                    |
| T C05 R07 | GCGCCTGTTGAGAAATCTACCTTATAATCTTGACAAGAACCATAACCAAG |
| T C05 R08 | TTACCAACAATAGCAAGCAAATCGCAGAAC                     |
| T C05 R09 | TTACCAGAAAAGTCAGATGGTTTTAAAAATCAACGTAACAAAATAAAAA  |
| T C05 R10 | TACCATTACCAGCGCCAAAGACAAAACAAAG                    |
| T C06 R01 | GGGTTGAGCCCTAAAGGGAGCCCTATGGTTG                    |
| T C06 R02 | CTTTGACGTTAACCCTTGTAGCAAGATTATTT                   |
| T C06 R03 | ACATTGGCATTAAAAATACCGAACAAATCAAC                   |
| T C06 R04 | AGTTGAAATAAAAAGTTTGTAGTAACTGCACGTA                 |
| T C06 R05 | AAACAGAAGCAAAAAGAAGATGATGACATAGCG                  |
| T C06 R06 | ATAGCTTAAATATATTTTTAGTTAAAAACAGTAG                 |
| T C06 R07 | GGCTTAATTTATCAACAATAGATAAATCATT                    |
| T C06 R08 | CCGCGCCCGCTAACGAGCGTCTTTCTGAACAC                   |
| T C06 R09 | CCTGAACAAGGAAACCGAGGAAACAAATTCAT                   |
| T C06 R10 | ATGGTTTAGCAAGGCCGAAACGTAGCCACCA                    |
| T C06 R11 | CCGGAACCGCCTCCCTCACCAGAATAAGGCTTGCCCTG             |
| T C07 R01 | AGCTTGACAAATCAAATTTGGGGC                           |
| T C07 R02 | TGATTAGTGCTACAGGGCGGTACCGATTTAG                    |
| T C07 R03 | AGCAGAAGTCAATCGTATGGTCAATCAAATATCGCGTTTTTCAGGTCT   |
| T C07 R04 | TTTGCGGATATCTGGTCAGTTGGCGAACACC                    |
| T C07 R05 | ATCAAGAACCATATCAATTTAGTCGAACCAGACCGGAATCAGAAAA     |
| T C07 R06 | TCTGACCTCTTAGAATCCTTGAAAAAACAAAC                   |
| T C07 R07 | ACAAGAAATATAAAGCAACAGTTGCAGGATTAGAGAGTACTCATTGAA   |
| T C07 R08 | TAATTTGCTTATTTTCATCGTAGGAGTCTGA                    |
| T C07 R09 | AACGGAATTAGACGGGAAGTACGGTTGATAAGAGGTCATTGCGTCCAA   |
| T C07 R10 | AAACCATCTGTCACAATCAATAGAGCAATAAT                   |
| T C08 R01 | CCCTTATGGGGAAAGCCGGCGACGCGCTTA                     |
| T C08 R02 | ATGCGCCAATAACATCACTTGCCCTACATT                     |
| T C08 R03 | TTGACGCATAAAACAGAGGTGACAAAACCT                     |
| T C08 R04 | CAATCAAACAAAAGAAACCACCAAAGGGTTA                    |
| T C08 R05 | GAACCTAAACAAAATTAATTACATTAATTA                     |
| T C08 R06 | ATTTTCCAAATTTAATGGTTTGACAAATTC                     |
| T C08 R07 | TTACCAGAATAATATCCCATCCACAAGCAA                     |
| T C08 R08 | GCCGTTTCAGTTACAAAATAAAAAACAGGGA                    |
| T C08 R09 | AGCGCATACCCAAAAGAACTGGGGAATAAG                     |
| T C08 R10 | TTTATTTGATAGCAGCACCGTAATCTTTTC                     |
| T C08 R11 | ATAATCAAATCACCTGTAGCTAGCTTAATTGCTGAA               |
| T C09 R01 | AGAAAGGATGGTGGTTAACAAACG                           |
| T C09 R02 | AAGAACTTAACCACCACACCCGCACGTGGCG                    |
| T C09 R03 | GTATTAACAACGCTCAGCGAGTAAGTCATTGCCTGAGAGTATGATATT   |
| T C09 R04 | GGAATTATGCTGAACCTCAAATATGGCGGTCA                   |
| T C09 R05 | ATTTCAATTTACTTCTGTGTAGCCAATCGATGAACGGTAAAAGGCCG    |
| T C09 R06 | ACCGTGTGTCTGTAATCGTCGCTATTTAACA                    |
| T C09 R07 | GAGCATGTGTATCATACGCCATCAGTCAATCATATGTACCGTAATGTG   |
| T C09 R08 | TTATTTATACCGCACTCATCGAGATAATTTAC                   |
| T C09 R09 | AGACTCCTGAGAGAATTTAAATCAAAAAGCCCCAAAAACAAACCCTCA   |
| T C09 R10 | CGACAGAAAACGCAAAGACACCACCATGATTA                   |
| T C10 R01 | CTGTTTGAAGGGAAGAAAGCGAAAGCGGTCAC                   |
| T C10 R02 | GCTGCGCGAAACTATCGGCCCTTGCCATTGCA                   |
| T C10 R03 | ACAGGAAAACCGCCTGCAACAGTGTCTAAAGC                   |
| T C10 R04 | ATCACCTTCATCATATTCCTGATTCTGATTGT                   |
| T C10 R05 | TTGGATTATGAATTACCTTTTTTAAGTGAATA                   |
| T C10 R06 | ACCTTGCTATAAATAAGGCGTTAAAGAAAAAG                   |

| Name      | Sequence                                        |
|-----------|-------------------------------------------------|
| T C10 R07 | CCTGTTTAAAGAAACCAATCAATAAGGGTATTA               |
| T C10 R08 | AACCAAGTCCCAATCCAAATAAGAAATAGCAG                |
| T C10 R09 | CCTTTACATATTACGCAGTATGTTGGCAACAT                |
| T C10 R10 | ATAAAAGATCAAGTTTGCCTTTAGTTTCGGTC                |
| T C10 R11 | ATAGCCCCCTTATTAGATATTTTAAATATTTAAATTGT          |
| T C11 R01 | GTTTGCCCGCAGCAAG                                |
| T C11 R02 | GCGCTGGCAAGTGTAGGAGCGGGCGCTAGG                  |
| T C11 R03 | CAATATTATTGCCCTTTCGTAATCATGGTCATGTTGTAAA        |
| T C11 R04 | GCAGCAAATGAAAAACCACGCTGAGAGCCA                  |
| T C11 R05 | TTCATCAATCTTTTCAAATTGTTATCCGCTTGGGTAAAC         |
| T C11 R06 | AAATCAATATATGTGATGGAAACAGTACAT                  |
| T C11 R07 | GGAATCATGCGGTTTGATACGAGCCGGAAGCACGAAAGGG        |
| T C11 R08 | TATCATTCCAAGAACTCGGCTGTCTTTCCT                  |
| T C11 R09 | AACGTCAACATTAATGGGGGTGCCAATGAGTGTGCGGGC         |
| T C11 R10 | TACATACATAAAGGTAGCAAACGTAGAAAA                  |
| T C11 R11 | CGTTTTCATTTCCAGATTGCGTTGCGCTCA                  |
| B C01 R01 | GCATTGACCCACCACC                                |
| B C01 R02 | ATAAGTATAGCCCGGGTCGAGAGGGTTGAT                  |
| B C01 R03 | ATAATAATAGAGCCACTTTGGGAA                        |
| B C01 R04 | CAACCTAAAACGAAACCACTACGAAGGCAC                  |
| B C01 R05 | ACGAGAAACAGAGCCGCACCAT                          |
| B C01 R06 | GGGGGTAATAGTAAAAGAAGTTTTGCCAGA                  |
| B C01 R07 | TATAATGCGGAACCAGCACCAATG                        |
| B C01 R08 | TTTATTTCAACGCAATTTGCGGGAGAAGCC                  |
| B C01 R09 | AAACGTTACGTTTGCCATCAGTAG                        |
| B C01 R10 | CAGGCTGCGCAACTGGCGCCATTGCGCCATT                 |
| B C01 R11 | CTGCCCCGCTCGGCATCGTCAGACTGTAGCG                 |
| B C02 R01 | GTCAGACGCAGGCGGATAAGTGCCAAATAGGTG               |
| B C02 R02 | TATCACCGGAATAGAAAGGAACAACGTTGAAA                |
| B C02 R03 | ATCTCCAAGGTAAAATACGTAATGGAGGCAAA                |
| B C02 R04 | AGAATACAGCTGCTCATTAGTGAACGAGTAG                 |
| B C02 R05 | TAAATTGGGAGAGGCTTTTGCAAAATGTTTAG                |
| B C02 R06 | ACTGGATATTTGCGGATGGCTTAGCAACATGT                |
| B C02 R07 | TTTAAATAATGACCCTGTAATACTGGATAAAA                |
| B C02 R08 | ATTTTTAGGGAAAGATTGTATAAGCGTTAAAAAT              |
| B C02 R09 | TCGCATTACCGGAAACCAGGCAAATTGGGAAG                |
| B C02 R10 | GGCGATCGGAGCTAACTCACATTATCGGGAAA                |
| B C02 R11 | CCTGTCGTGCCAGCTGAAATGAAAACGATTTTTGT             |
| B C03 R01 | AGGTTTAGGGGTTTTGCTCAGTACATTGGCCTGAGCAAGA        |
| B C03 R02 | CTCATCTTAAGTTTCCATTAACGAAAAAAGGCCACAAGGTTGCTAT  |
| B C03 R03 | TACTGCGTAAAAACCAAAATAGCGCTTGAGAGGGTAATCTGAATC   |
| B C03 R04 | TATATTTTTGTACCAAAAACATTTGCAACTAAGAATTAACCAGAGCC |
| B C03 R05 | CTCTTCGCGCACCGCTTCTGGTGAATTTTTGAACATAAACAGCCATA |
| B C04 R01 | ATAAATCGGATTAGGATTAGCGTACCGCCA                  |
| B C04 R02 | CCCTCAGTAAACAACTTTCAACGGAGCCTT                  |
| B C04 R03 | TAATTGTGACTTTTTCATGAGGTGACCCCC                  |
| B C04 R04 | AGCGATTGGATATTCATTACCTTTCAACT                   |
| B C04 R05 | TTAATCATTTACCAGACGACGAAATCGTCA                  |
| B C04 R06 | TAAATATCTTTAATTGCTCCTTTGTCTGGA                  |
| B C04 R07 | AGTTTCAATAAAGCTAAATCGGAAATGCAA                  |
| B C04 R08 | TGCCTGACCGGTTGATAATCAGGCTCATTT                  |
| B C04 R09 | TTTAACCTCCAGCCAGCTTTCCTATTACGC                  |
| B C04 R10 | CAGCTGGTAAAGTGTAAGCCTAATCGGCC                   |



| Name      | Sequence                                           |
|-----------|----------------------------------------------------|
| B C04 R11 | AACGCGCGGGGAGAGAATTACTATAAGAATAAACACC              |
| B C05 R01 | CCCTCAGAAGACTCCTCAAGAGAACTCATTAAAAATATAAA          |
| B C05 R02 | CGCGAAACGGCTTTGAGGACTAAAATCGGTTTGGCAGAGGTGATGCAA   |
| B C05 R03 | TCCCCCTCACTATCATAACCCTCGTTGTGAATGCCATATGAGAAAA     |
| B C05 R04 | TAGGTAAAAATAAAGCCTCAGAGCTTCCATATCAACGCTCTTTCATCT   |
| B C05 R05 | GGATGTGCCTCAGGAAGATCGCACAAATAGGAATGCGTTATAAAATACCG |
| B C06 R01 | GCAGTCTCAAGTATTAAGAGGCTGACCGCCAC                   |
| B C06 R02 | CCTCAGAGTTAGTAAATGAATTTTGTCTTCGA                   |
| B C06 R03 | GGTGAATTTAGCAACGGCTACAGAAAAAGTACA                  |
| B C06 R04 | ACGGAGATGACCTTCATCAAGAGTGCGATTTT                   |
| B C06 R05 | AAGAACTGGCATAAGTAAGAGCAACAAATGCTT                  |
| B C06 R06 | TAAACAGTGCAAACCTCAACAGGTATTCCCAA                   |
| B C06 R07 | TTCTGCGAATTAGCAAAAATTAAGCGATTCAAA                  |
| B C06 R08 | AGGGTGAGATCGTAAAACCTAGCATAAAAAATAAT                |
| B C06 R09 | TCGCGTCTCGACGACAGTATCGGCTGCAAGGC                   |
| B C06 R10 | GATTAAGTCACAATTCCACACAACCGTATTGG                   |
| B C06 R11 | GCGCCAGGGTGGTTTTTATAATCATCAGATGATGGCAA             |
| B C07 R01 | CTCATTTTATTCTGAAACATGATGAATTTAGAGAAAACA            |
| B C07 R02 | TCGCCTGGCATCGGAACGAGGGTCTTAAACGAATATACCAATTCTGA    |
| B C07 R03 | CGAGAATAAAAAGGAATTACGAGGCTCATTAATTGCGTGAACGTT      |
| B C07 R04 | GAGACAGCAGGCAAGGCAAAGAACGAGTAGAAAATTATTATTATCAT    |
| B C07 R05 | GCCAGGGGCCAGTTTGAGGGGAGGCCCTTCCAATAATGGGAAGGAGC    |
| B C08 R01 | TCATACATCTATTTGGAACCTATTCAGGGAT                    |
| B C08 R02 | AGCAAGCCACGATCTAAAGTTTTGTACCGATA                   |
| B C08 R03 | GTTGCGCCTCAGCAGCGAAAAGACAATAAATTG                  |
| B C08 R04 | TGTCGAAAACGGGTGTACAGACCAGCAGGACGT                  |
| B C08 R05 | TGGGAAGAGCAGATAACATAACGCCGACCATAA                  |
| B C08 R06 | ATCAAAAAAATTCGAGCTTCAAAGTTGACCAT                   |
| B C08 R07 | TAGATACACATCCAATAAATCATATCAAATCA                   |
| B C08 R08 | CCATCAATCTGGAGCAAACAAGAGAGCTTTCA                   |
| B C08 R09 | TCAACATTTGTAACCGTGCATCTTTTTCCCA                    |
| B C08 R10 | GTCACGACAGCTGTTTCTGTGTGACCAGTGA                    |
| B C08 R11 | GACGGGCAACAGCTGACCGCCAGTGGTAATATCCAGAA             |
| B C09 R01 | ACCCATGTAGTTAATGCCCCCTGCGGCTTTTGGAAAAGCGT          |
| B C09 R02 | CTGCTCCATGCGGGATCGTCACCCGACAATGACTGGCCAATATAATCA   |
| B C09 R03 | TTACCCTGACCACATTCAACTAATAAAAATCTACAGTCACTGTCCAT    |
| B C09 R04 | CAACCGTTATAGTAGTAGCATTAAATTTGCAACTGAAATGTACTTCTT   |
| B C09 R05 | ACGACGGCGGTGTAGATGGGCGCAAAATGTGATGGAAATACTGAGTAG   |
| B C10 R01 | CTGGTAAAGTGCCCGTATAAACACCGTAAC                     |
| B C10 R02 | ACTGAGTCATTCCACAGACAGCATCGCCCA                     |
| B C10 R03 | CGCATAAGTTAAAGGCCGCTTTTGTACTT                      |
| B C10 R04 | AGCCGGAGAACTGACCAACTTTAAACGAAC                     |
| B C10 R05 | TAACGGATTGAGATTTAGGAATACTATTAT                     |
| B C10 R06 | AGTCAGAGAAGCCCAGAAAGACTTAACCTGT                    |
| B C10 R07 | TTAGCTAGCATCAATTCTACTACTAGCTGA                     |
| B C10 R08 | TAAATTATACAAAGGCTATCAGCAACCCGT                     |
| B C10 R09 | CGGATTCGGGATAGGTCACGTTCAAGTGCCA                    |
| B C10 R10 | AGCTTGCGTACCGAGCTCGAATCACCGCCT                     |
| B C10 R11 | GGCCCTGAGAGAGTTCAGCAGGCGAAAATC                     |
| B C11 R01 | CAGTGCCTTGAGTAACTAAGTTTTGTCTATCA                   |
| B C11 R02 | ACTACAACGCCTGTAGTTCGTCACCAGTACAA                   |
| B C11 R03 | CTGAGGCTTGCAAGGACCGATATACGTGGACTCCAACGTC           |
| B C11 R04 | CAATCATAAGGGAACCACGAGGCGCAGACGGT                   |

| Name      | Sequence                                   |
|-----------|--------------------------------------------|
| B C11 R05 | TAGAAAAGATTCATCAGACAACATTCAGTTTGGAAACAAGA  |
| B C11 R06 | TCAAAAAGATTAAGAGAGCAAAGCGGATTGCA           |
| B C11 R07 | GCGAGCTGAAAAGGTGTATTTTTCAAGAATAGCCCGAGATA  |
| B C11 R08 | CTATTTTTGAGAGATCATGCCGGAGAGGGTAG           |
| B C11 R09 | GCGGATTGACCGTAATTCCGTGGGCCGAAAATCGGC AAAAT |
| B C11 R10 | TCTAGAGGATCCCCGGATGCCTGCAGGTCGAC           |

## 4.2 Robot, track, cargo and goal strands

Table S2: Robot, track, cargo and goal strands.

| Name                 | Sequence                                                                |
|----------------------|-------------------------------------------------------------------------|
| robot                | CCATTC CCTATCACACCATACTCTAC ATCCAC CCTCAAAACTTATCC ATCCAC               |
| robot-Q              | CCATTC CCTATCACACCATACTCTAC ATCCAC<br>CCTCAAAACTTATCC ATCCAC /3IAbRQSp/ |
| robot inhibitor      | GTGCTC GTGGAT GTAGAGTATGGTGTGATAGG GAATGG                               |
| robot trigger        | CCTATCACACCATACTCTAC ATCCAC GAGCAC                                      |
| robot start attacher | GGAAGTAAGTAGAAG GTGGAT GGATAAGTTTTGAGG                                  |
| robot start staple   | CTTCTACTTACTTCC TT - staple                                             |
| track1 staple        | staple - TTTTT GTGGAT GGATAAGTTTTGAGG                                   |
| track2 staple        | staple - TTTTT TTTTTT GGATAAGTTTTGAGG GTGGAT                            |
| robot goal staple    | staple - TTTTT GTGGAT GGATAAGTTTTGAGG GTGGAT                            |
| cargo1               | AGATGT GTAGAGTATGGTGTGATAGG GAATGG TT                                   |
| cargo1-F             | AGATGT GTAGAGTATGGTGTGATAGG GAATGG TT /3ATTO532N/                       |
| cargo1 attacher      | CCTATCACACCATACTCTAC ACCTTACCTCATCCCTAACTT                              |
| cargo1 attacher-Q    | /5IAbRQ/ CCTATCACACCATACTCTAC ACCTTACCTCATCCCTAACTT                     |
| cargo1 staple        | staple - TTTTT AAGTTAGGGATGAGGTAAGGT                                    |
| cargo2               | GAAAGG GTAGAGTATGGTGTGATAGG GAATGG TT                                   |
| cargo2-F             | GAAAGG GTAGAGTATGGTGTGATAGG GAATGG TT /3ATTO590N/                       |
| cargo2 attacher      | CCTATCACACCATACTCTAC CTCCCTACCCATATCACCTT                               |
| cargo2 attacher-Q    | /5IAbRQ/ CCTATCACACCATACTCTAC CTCCCTACCCATATCACCTT                      |
| cargo2 staple        | staple - TTTTT AAGGTGATATGGGTAGGGAG                                     |
| goal1                | CCATTC CCTATCACACCATACTCTAC ACATCT ACTAACTCCTACCCACACCT                 |
| goal1-Q              | /5IAbRQ/ CCATTC CCTATCACACCATACTCTAC ACATCT<br>ACTAACTCCTACCCACACCT     |
| goal1 staple         | staple - TTTTT AGGTGTGGGTAGGAGTTAGT                                     |
| goal2                | CCATTC CCTATCACACCATACTCTAC CCTTTC CAACTCTCCACTCCAATCAA                 |
| goal2-Q              | /5IAbRQ/ CCATTC CCTATCACACCATACTCTAC CCTTTC<br>CAACTCTCCACTCCAATCAA     |
| goal2 staple         | stape - TTTTT TTGATTGGAGTGGAGAGTTG                                      |
| goal1 inhibitor      | AGATGT GTAGAGTATG ACACTT                                                |
| goal2 inhibitor      | GAAAGG GTAGAGTATG ACACTT                                                |
| goal inhibitor       | ACTCTA GTGTGATAGG GAATGG                                                |
| goal trigger1        | AAGTGT CATACTCTAC                                                       |
| goal trigger2        | CCTATCACAC TAGAGT                                                       |

## References

1. Mark Yim, Wei-Min Shen, Behnam Salemi, Daniela Rus, Mark Moll, Hod Lipson, Eric Klavins, and Gregory S Chirikjian. Modular self-reconfigurable robot systems [grand challenges of robotics]. *IEEE Robotics & Automation Magazine*, 14(1):43–52, 2007.
2. Muneaki Nakamura, Lu Chen, Stuart C Howes, Tony D Schindler, Eva Nogales, and Zev Bryant. Remote control of myosin and kinesin motors using light-activated gearshifting. *Nature Nanotechnology*, 9(9):693–697, 2014.
3. Akane Furuta, Misako Amino, Maki Yoshio, Kazuhiro Oiwa, Hiroaki Kojima, and Ken’ya Furuta. Creating biomolecular motors based on dynein and actin-binding proteins. *Nature Nanotechnology*, 12(3):233–237, 2017.
4. Turlough Neary and Damien Woods. The complexity of small universal Turing machines: a survey. In *SOFSEM: Theory and Practice of Computer Science*, volume 7147 of *LNCS*, pages 385–405. Springer, 2012.
5. Eric Bonabeau, Marco Dorigo, and Guy Theraulaz. Inspiration for optimization from social insect behaviour. *Nature*, 406(6791):39–42, 2000.
6. Paul WK Rothmund. Folding DNA to create nanoscale shapes and patterns. *Nature*, 440(7082):297–302, 2006.
7. Nadrian C Seeman. Nucleic acid junctions and lattices. *Journal of Theoretical Biology*, 99(2):237–247, 1982.
8. Bernard Yurke, Andrew J Turberfield, Allen P Mills, Friedrich C Simmel, and Jennifer L Neumann. A DNA-fuelled molecular machine made of dna. *Nature*, 406(6796):605–608, 2000.
9. Suvir Venkataraman, Robert M Dirks, Paul WK Rothmund, Erik Winfree, and Niles A Pierce. An autonomous polymerization motor powered by DNA hybridization. *Nature Nanotechnology*, 2(8):490–494, 2007.
10. Philip Ketterer, Elena M Willner, and Hendrik Dietz. Nanoscale rotary apparatus formed from tight-fitting 3D DNA components. *Science Advances*, 2(2):e1501209, 2016.
11. William B Sherman and Nadrian C Seeman. A precisely controlled DNA biped walking device. *Nano Letters*, 4(7):1203–1207, 2004.
12. Jong-Shik Shin and Niles A Pierce. A synthetic DNA walker for molecular transport. *Journal of the American Chemical Society*, 126(35):10834–10835, 2004.
13. Peng Yin, Hao Yan, Xiaojun G Daniell, Andrew J Turberfield, and John H Reif. A unidirectional DNA walker that moves autonomously along a track. *Angewandte Chemie International Edition*, 43(37):4906–4911, 2004.
14. Jonathan Bath, Simon J Green, and Andrew J Turberfield. A free-running DNA motor powered by a nicking enzyme. *Angewandte Chemie International Edition*, 117(28):4432–4435, 2005.

15. Ye Tian, Yu He, Yi Chen, Peng Yin, and Chengde Mao. A DNAzyme that walks processively and autonomously along a one-dimensional track. *Angewandte Chemie International Edition*, 44(28):4355–4358, 2005.
16. Renjun Pei, Steven K Taylor, Darko Stefanovic, Sergei Rudchenko, Tiffany E Mitchell, and Milan N Stojanovic. Behavior of polycatalytic assemblies in a substrate-displaying matrix. *Journal of the American Chemical Society*, 128(39):12693–12699, 2006.
17. Peng Yin, Harry MT Choi, Colby R Calvert, and Niles A Pierce. Programming biomolecular self-assembly pathways. *Nature*, 451(7176):318–322, 2008.
18. Tosan Omabegho, Ruojie Sha, and Nadrian C Seeman. A bipedal DNA brownian motor with coordinated legs. *Science*, 324(5923):67–71, 2009.
19. Kyle Lund, Anthony J Manzo, Nadine Dabby, Nicole Michelotti, Alexander Johnson-Buck, Jeanette Nangreave, Steven Taylor, Renjun Pei, Milan N Stojanovic, Nils G Walter, et al. Molecular robots guided by prescriptive landscapes. *Nature*, 465(7295):206–210, 2010.
20. Shelley FJ Wickham, Jonathan Bath, Yousuke Katsuda, Masayuki Endo, Kumi Hidaka, Hiroshi Sugiyama, and Andrew J Turberfield. A DNA-based molecular motor that can navigate a network of tracks. *Nature Nanotechnology*, 7(3):169–173, 2012.
21. Hongzhou Gu, Jie Chao, Shou-Jun Xiao, and Nadrian C Seeman. A proximity-based programmable DNA nanoscale assembly line. *Nature*, 465(7295):202–205, 2010.
22. C Jung, PB Allen, and AD Ellington. A stochastic DNA walker that traverses a microparticle surface. *Nature Nanotechnology*, 11(2):157–163, 2016.
23. Marvin Bentley and Gary Banker. The cellular mechanisms that maintain neuronal polarity. *Nature Reviews Neuroscience*, 17(10):611–622, 2016.
24. Nigel R Franks and Ana B Sendova-Franks. Brood sorting by ants: distributing the workload over the work-surface. *Behavioral Ecology and Sociobiology*, 30(2):109–123, 1992.
25. Donald Ervin Knuth. *The art of computer programming: sorting and searching*, volume 3. Pearson Education, 1998.
26. Spyros Artavanis-Tsakonas, Matthew D Rand, and Robert J Lake. Notch signaling: cell fate control and signal integration in development. *Science*, 284(5415):770–776, 1999.
27. Jean-Louis Deneubourg, Simon Goss, Nigel Franks, Ana Sendova-Franks, Claire Detrain, and Laetitia Chrétien. The dynamics of collective sorting robot-like ants and ant-like robots. In *Proceedings of the first international conference on simulation of adaptive behavior on From animals to animats*, pages 356–363, 1991.
28. Owen Holland and Chris Melhuish. Stigmergy, self-organization, and sorting in collective robotics. *Artificial Life*, 5(2):173–202, 1999.
29. Andrew J Turberfield, JC Mitchell, Bernard Yurke, Allen P Mills Jr, MI Blakey, and Friedrich C Simmel. DNA fuel for free-running nanomachines. *Physical Review Letters*, 90(11):118102, 2003.

30. David Yu Zhang and Erik Winfree. Control of DNA strand displacement kinetics using toehold exchange. *Journal of the American Chemical Society*, 131(47):17303–17314, 2009.
31. László Lovász. Random walks on graphs: a survey. *Combinatorics*, 2:1–46, 1993.
32. Carlos Ernesto Castro, Fabian Kilchherr, Do-Nyun Kim, Enrique Lin Shiao, Tobias Wauer, Philipp Wortmann, Mark Bathe, and Hendrik Dietz. A primer to scaffolded DNA origami. *Nature Methods*, 8(3):221–229, 2011.
33. Petr Šulc, Thomas E Ouldridge, Flavio Romano, Jonathan PK Doye, and Ard A Louis. Simulating a burnt-bridges DNA motor with a coarse-grained DNA model. *Natural Computing*, 13(4):535–547, 2014.
34. Steven B Smith, Yujia Cui, and Carlos Bustamante. Overstretching B-DNA: the elastic response of individual double-stranded and single-stranded DNA molecules. *Science*, 271(5250):795–799, 1996.
35. Shelley FJ Wickham, Masayuki Endo, Yousuke Katsuda, Kumi Hidaka, Jonathan Bath, Hiroshi Sugiyama, and Andrew J Turberfield. Direct observation of stepwise movement of a synthetic molecular transporter. *Nature Nanotechnology*, 6(3):166–169, 2011.
36. Alexander Johnson-Buck, Jeanette Nangreave, Shuoxing Jiang, Hao Yan, and Nils G Walter. Multifactorial modulation of binding and dissociation kinetics on two-dimensional DNA nanostructures. *Nano Letters*, 13(6):2754–2759, 2013.
37. Mario Teichmann, Enzo Kopperger, and Friedrich C Simmel. Robustness of localized DNA strand displacement cascades. *ACS Nano*, 8(8):8487–8496, 2014.
38. Nobutaka Hirokawa, Yasuko Noda, Yosuke Tanaka, and Shinsuke Niwa. Kinesin superfamily motor proteins and intracellular transport. *Nature Reviews Molecular Cell Biology*, 10(10):682–696, 2009.
39. Kevin Yehl, Andrew Mugler, Skanda Vivek, Yang Liu, Yun Zhang, Mengzhen Fan, Eric R Weeks, and Khalid Salaita. High-speed DNA-based rolling motors powered by RNase H. *Nature Nanotechnology*, 11(2):184–190, 2016.
40. Adam JM Wollman, Carlos Sanchez-Cano, Helen MJ Carstairs, Robert A Cross, and Andrew J Turberfield. Transport and self-organization across different length scales powered by motor proteins and programmed by DNA. *Nature Nanotechnology*, 9(1):44–47, 2014.
41. Grigory Tikhomirov, Philip Petersen, and Lulu Qian. Programmable disorder in random DNA tilings. *Nature Nanotechnology*, 12(3):251–259, 2017.
42. Richard A Muscat, Jonathan Bath, and Andrew J Turberfield. Small molecule signals that direct the route of a molecular cargo. *Small*, 8(23):3593–3597, 2012.
43. Yu He and David R Liu. Autonomous multistep organic synthesis in a single isothermal solution mediated by a DNA walker. *Nature Nanotechnology*, 5(11):778–782, 2010.
44. Wenjing Meng, Richard A Muscat, Mireya L McKee, Phillip J Milnes, Afaf H El-Sagheer, Jonathan Bath, Benjamin G Davis, Tom Brown, Rachel K O’Reilly, and Andrew J Turberfield. An autonomous molecular assembler for programmable chemical synthesis. *Nature Chemistry*, 8(6):542–548, 2016.

45. Tae-Gon Cha, Jing Pan, Haorong Chen, Janette Salgado, Xiang Li, Chengde Mao, and Jong Hyun Choi. A synthetic DNA motor that transports nanoparticles along carbon nanotubes. *Nature Nanotechnology*, 9(1):39–43, 2014.
46. Anton Kuzyk, Yangyang Yang, Xiaoyang Duan, Simon Stoll, Alexander O Govorov, Hiroshi Sugiyama, Masayuki Endo, and Na Liu. A light-driven three-dimensional plasmonic nanosystem that translates molecular motion into reversible chiroptical function. *Nature Communications*, 7, 2016.
47. Shawn M Douglas, Ido Bachelet, and George M Church. A logic-gated nanorobot for targeted transport of molecular payloads. *Science*, 335(6070):831–834, 2012.
48. Hanyong Peng, Xing-Fang Li, Hongquan Zhang, and X Chris Le. A microRNA-initiated DNAzyme motor operating in living cells. *Nature Communications*, 8, 2017.
49. Michael Rubenstein, Alejandro Cornejo, and Radhika Nagpal. Programmable self-assembly in a thousand-robot swarm. *Science*, 345(6198):795–799, 2014.
50. Gourab Chatterjee, Neil Dalchau, Richard A Muscat, Andrew Phillips, and Georg Seelig. A spatially localized architecture for fast and modular DNA computing. *Nature Nanotechnology*, 2017. doi:10.1038/nnano.2017.127.
51. Lulu Qian and Erik Winfree. Parallel and scalable computation and spatial dynamics with DNA-based chemical reaction networks on a surface. *Lecture Notes in Computer Science*, 8727:114–131, 2014.
52. Joseph N Zadeh, Conrad D Steenberg, Justin S Bois, Brian R Wolfe, Marshall B Pierce, Asif R Khan, Robert M Dirks, and Niles A Pierce. NUPACK: analysis and design of nucleic acid systems. *Journal of Computational Chemistry*, 32(1):170–173, 2011.
53. Neil Dalchau, Harish Chandran, Nikhil Gopalkrishnan, Andrew Phillips, and John Reif. Probabilistic analysis of localized DNA hybridization circuits. *ACS Synthetic Biology*, 4(8):898–913, 2015.
54. James G Wetmur. Hybridization and renaturation kinetics of nucleic acids. *Annual Review of Biophysics and Bioengineering*, 5(1):337–361, 1976.
55. Grégoire Bonnet, Oleg Krichevsky, and Albert Libchaber. Kinetics of conformational fluctuations in DNA hairpin-loops. *Proceedings of the National Academy of Sciences*, 95(15):8602–8606, 1998.
56. Niranjana Srinivas, Thomas E Ouldridge, Petr Šulc, Joseph M Schaeffer, Bernard Yurke, Ard A Louis, Jonathan PK Doye, and Erik Winfree. On the biophysics and kinetics of toehold-mediated DNA strand displacement. *Nucleic Acids Research*, 41(22):10641–10658, 2013.
57. Sidney Redner. *A guide to first-passage processes*. Cambridge University Press, 2001.
